# Supplementary figures and images for: Homological Landscape of Human Brain Functional Sub-Circuits
Source: MDPI journal article supplement (doi:10.3390/math12030455), 2024-01-31

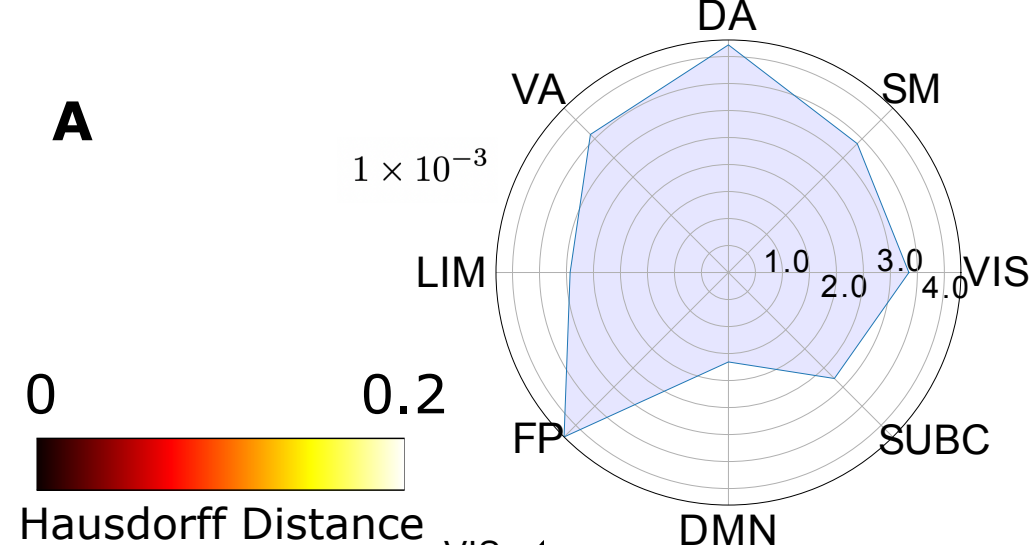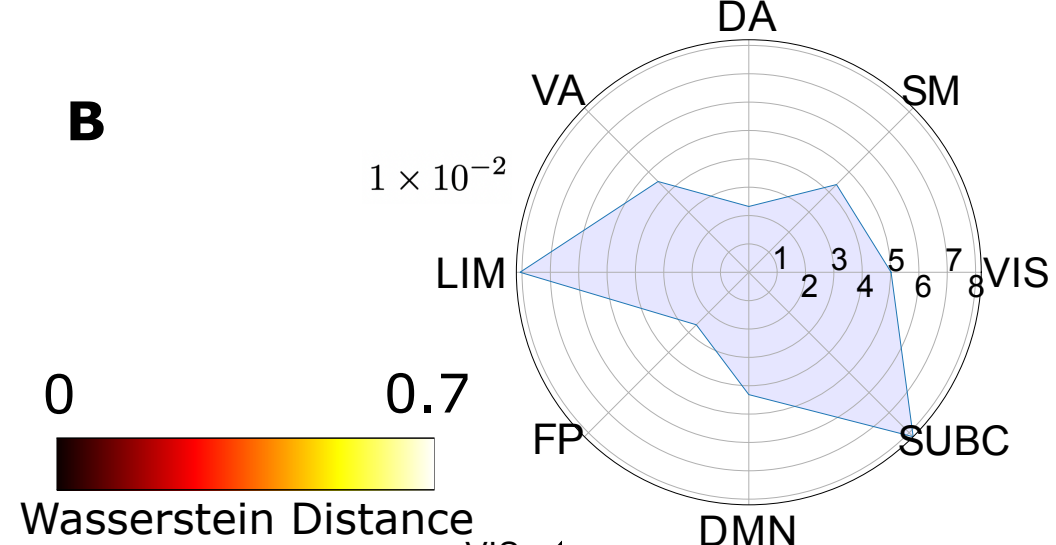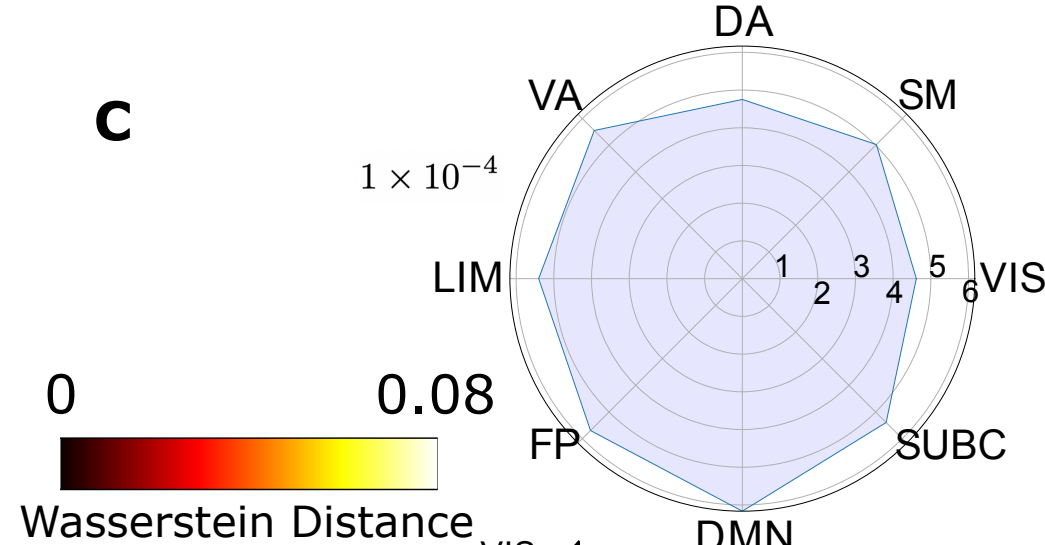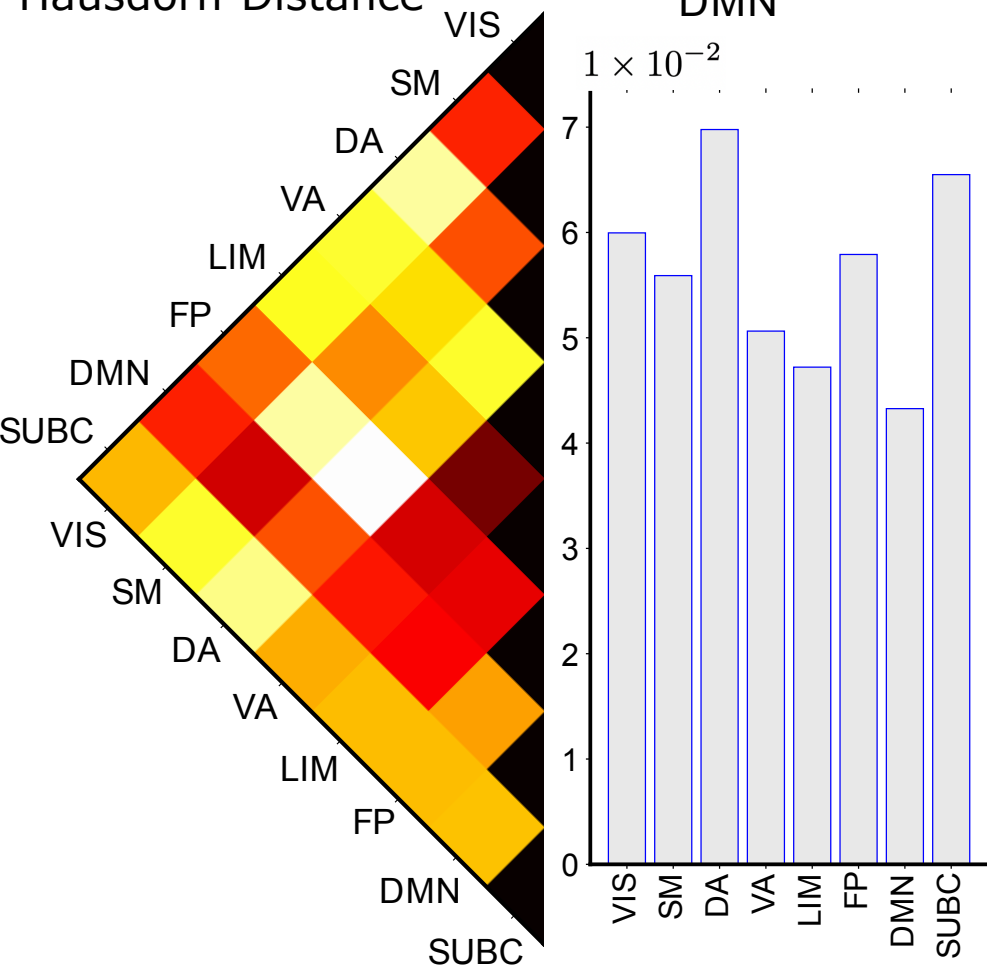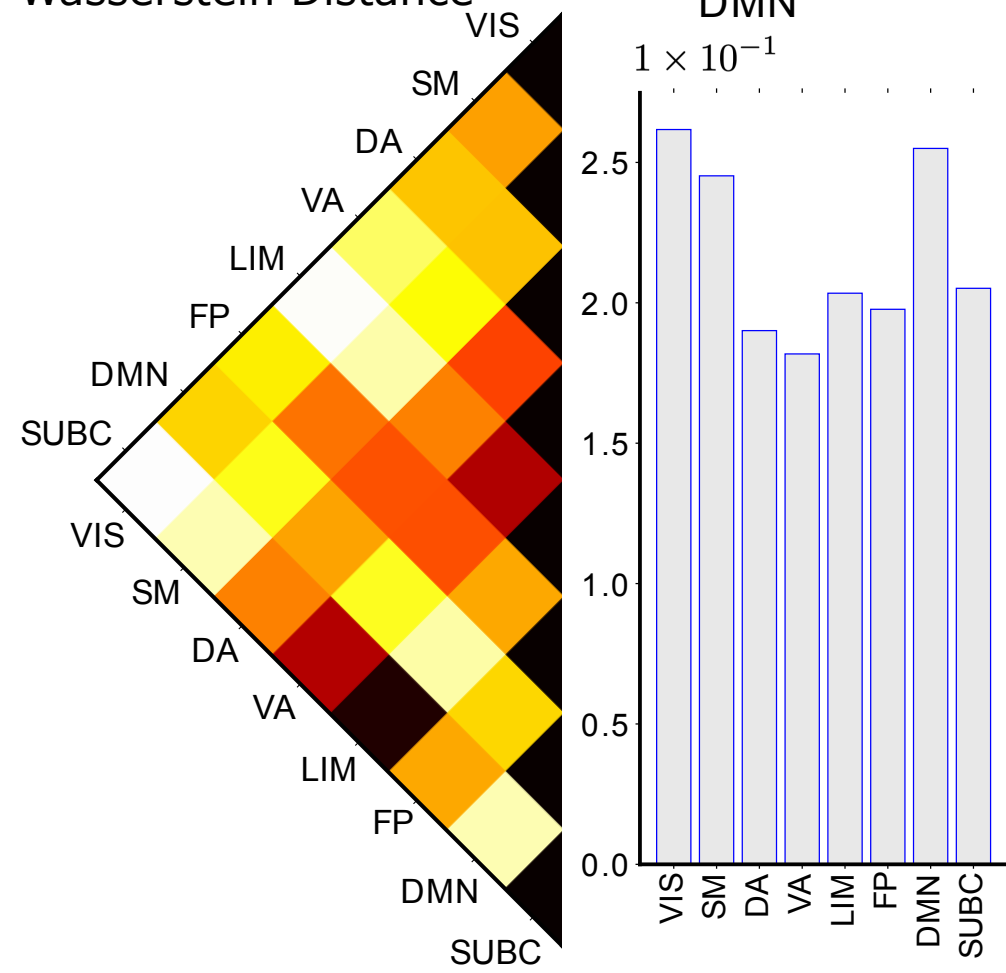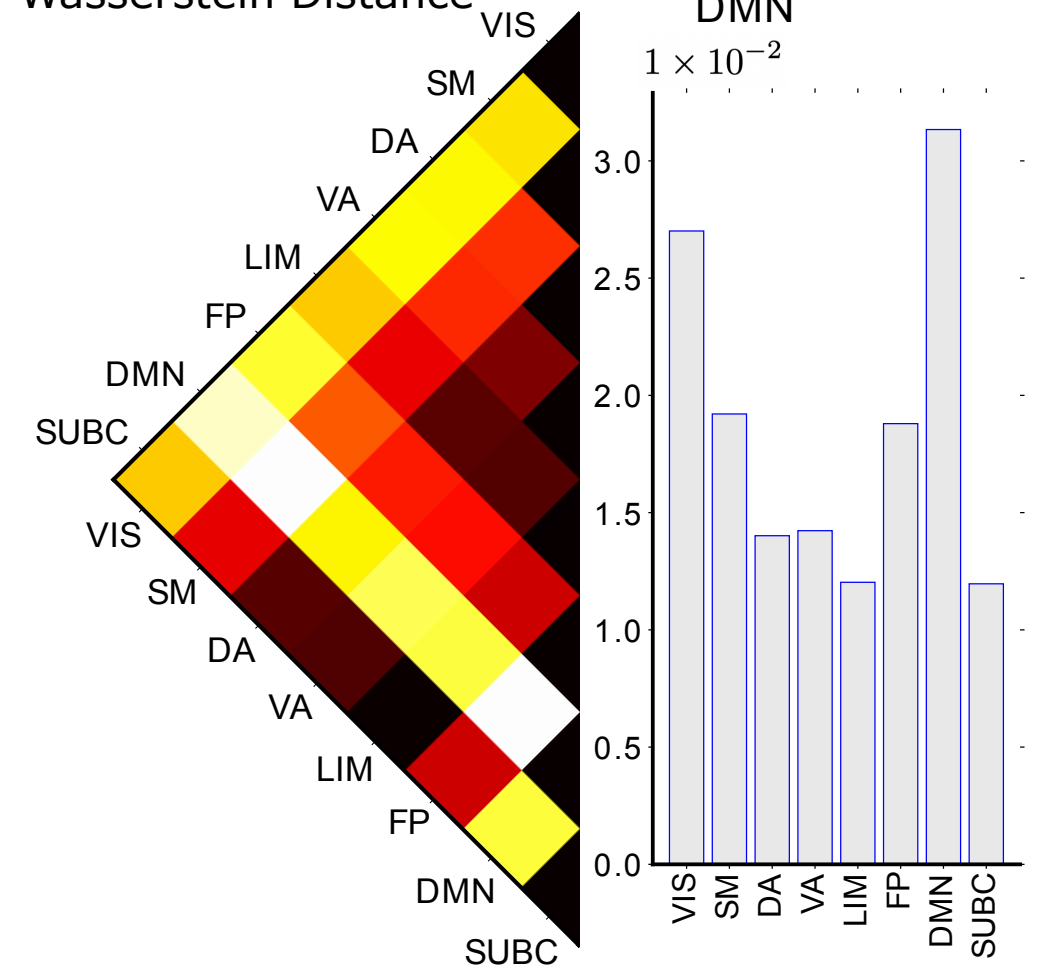

Supplement: s1 [file s1]

Emotional

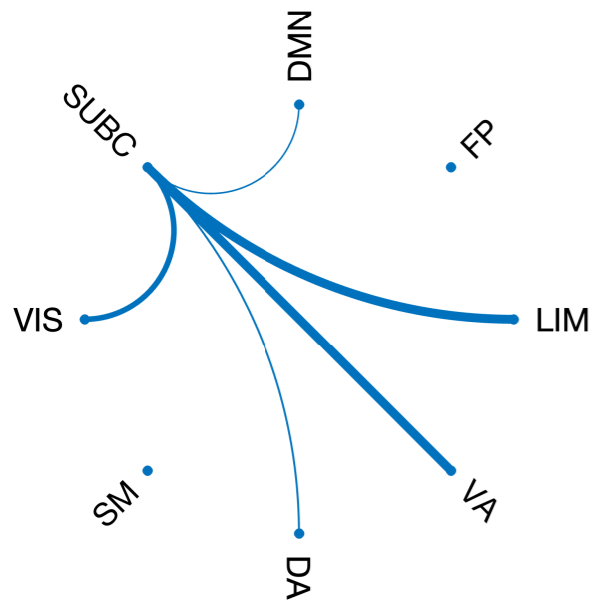

Gambling

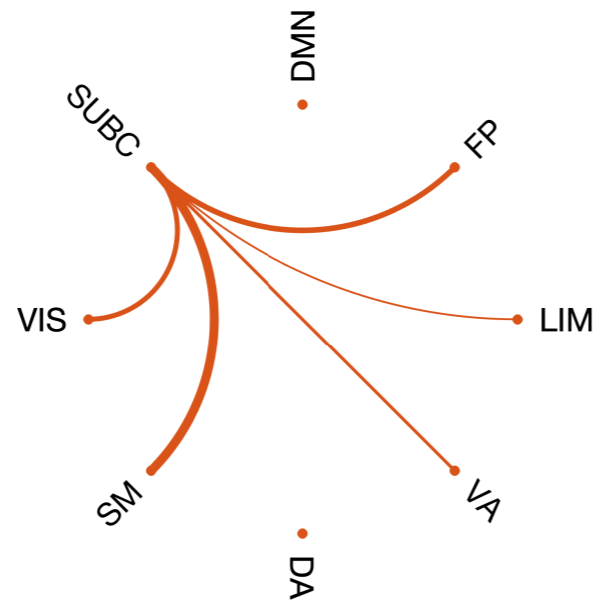

Language

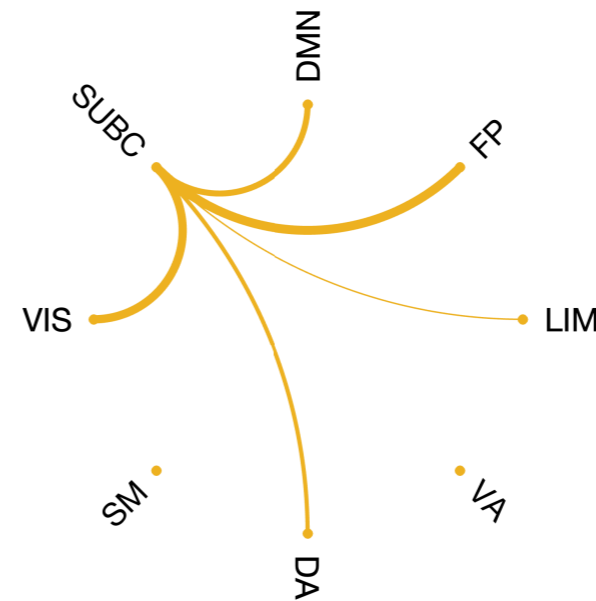

Motor

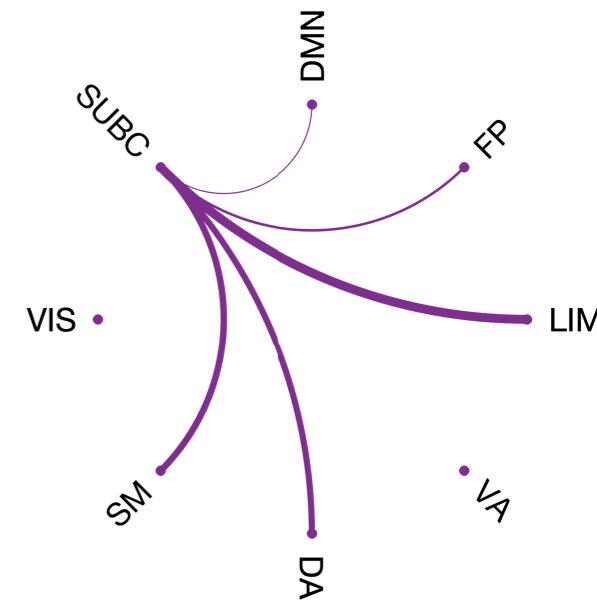

Relational

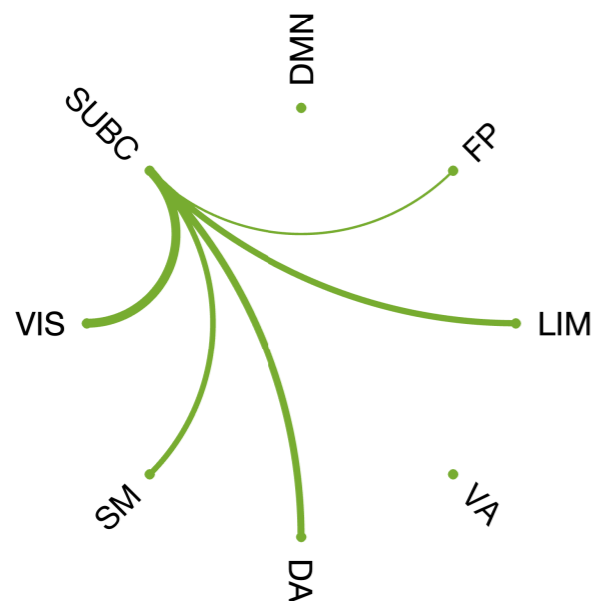

Social

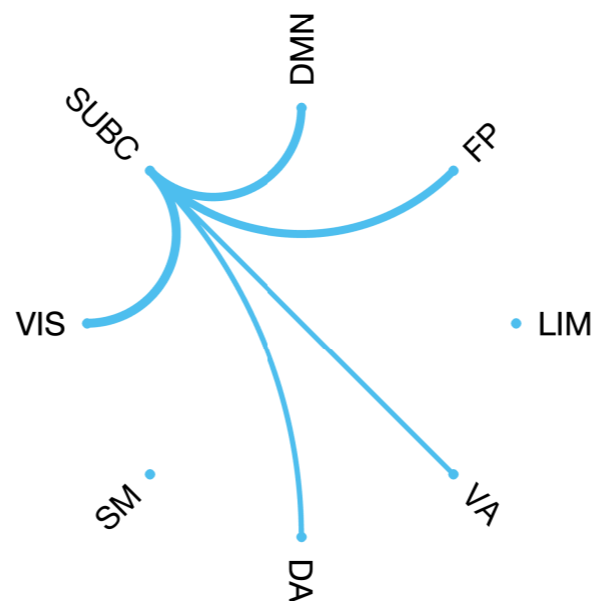

Working Memory

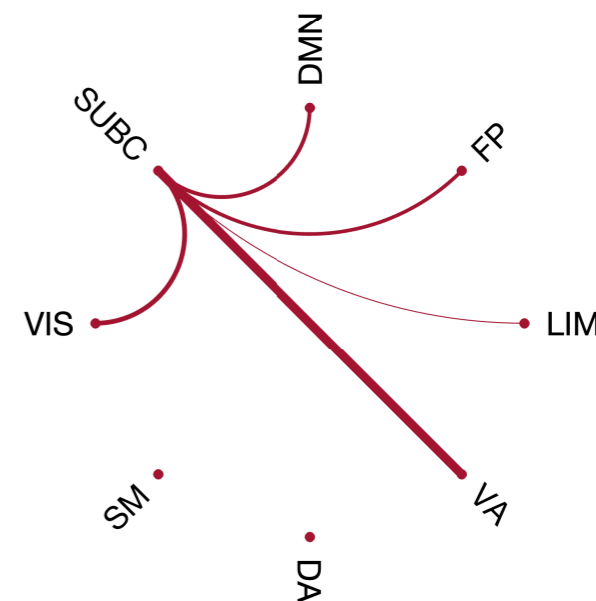

Supplement: s1 [file s1]

Emotional

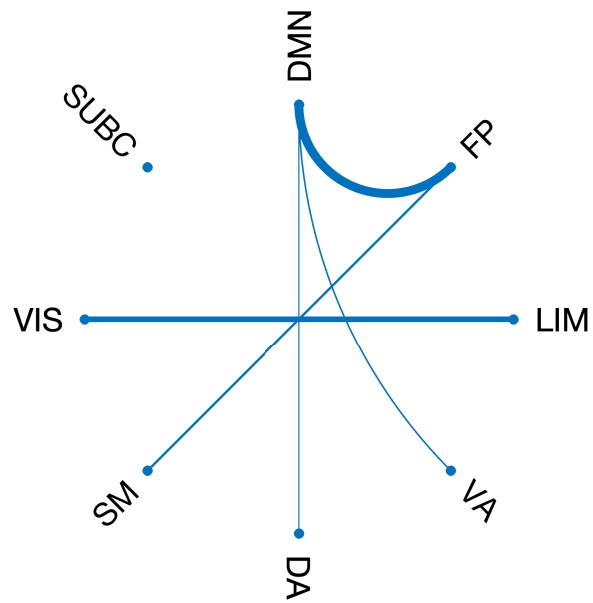

Gambling

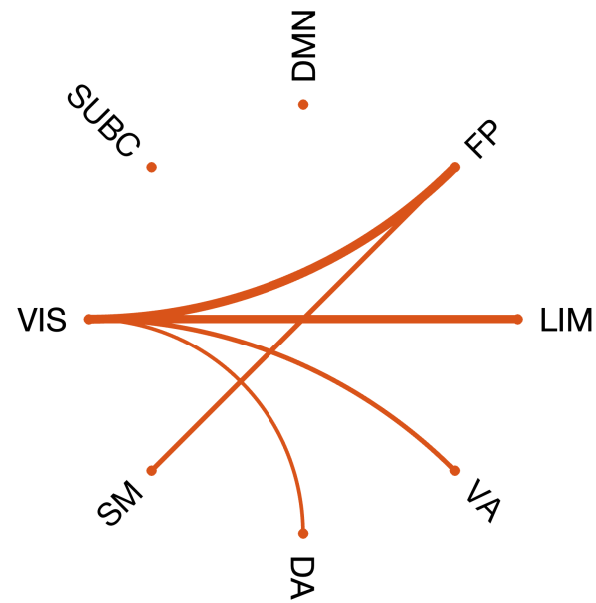

Language

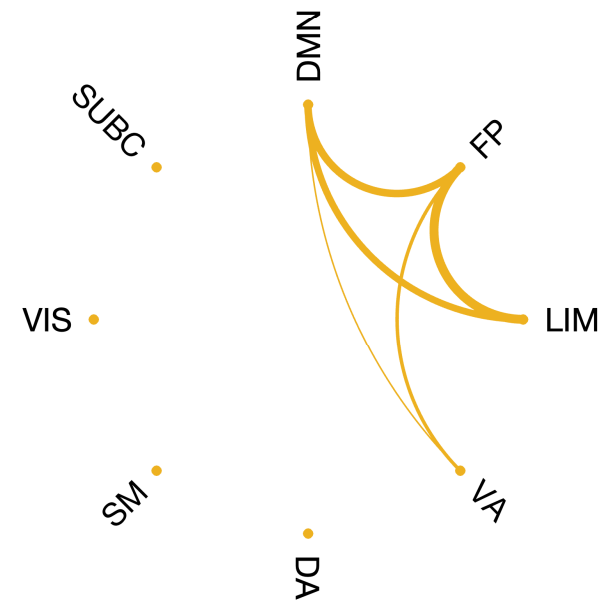

Motor

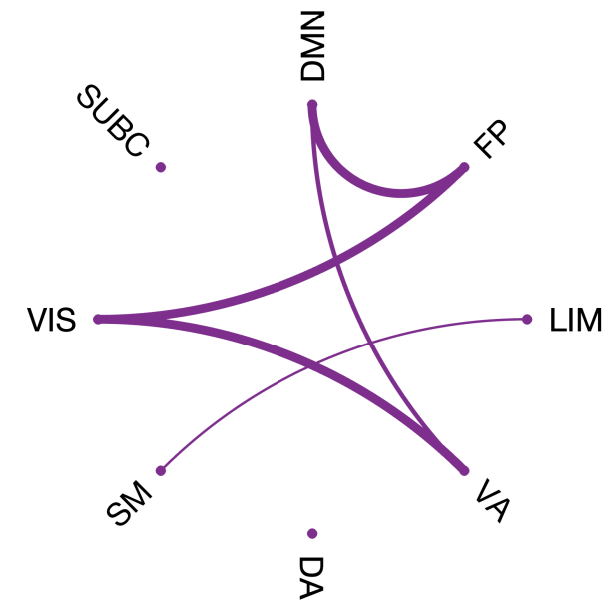

Relational

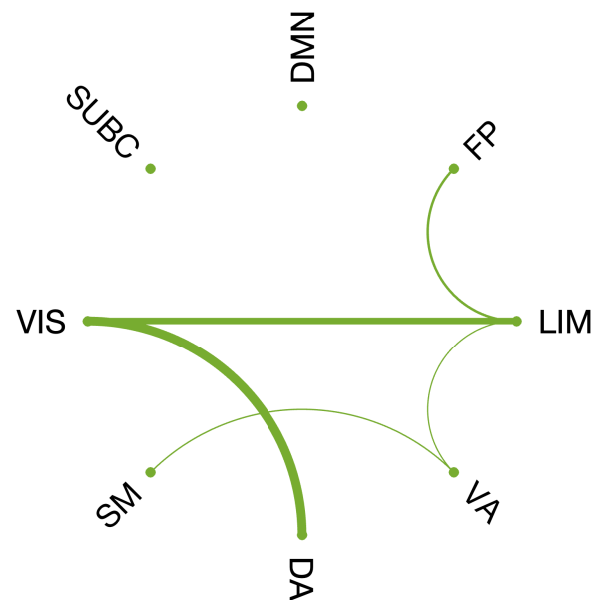

Social

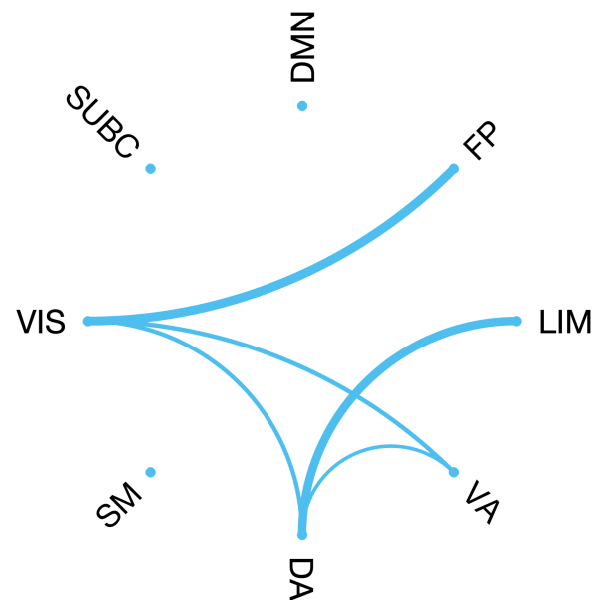

Working Memory

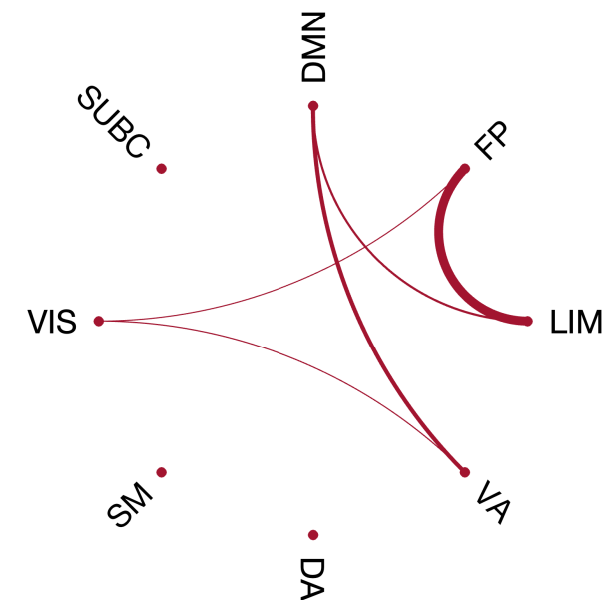

Supplement: s1 [file s1]

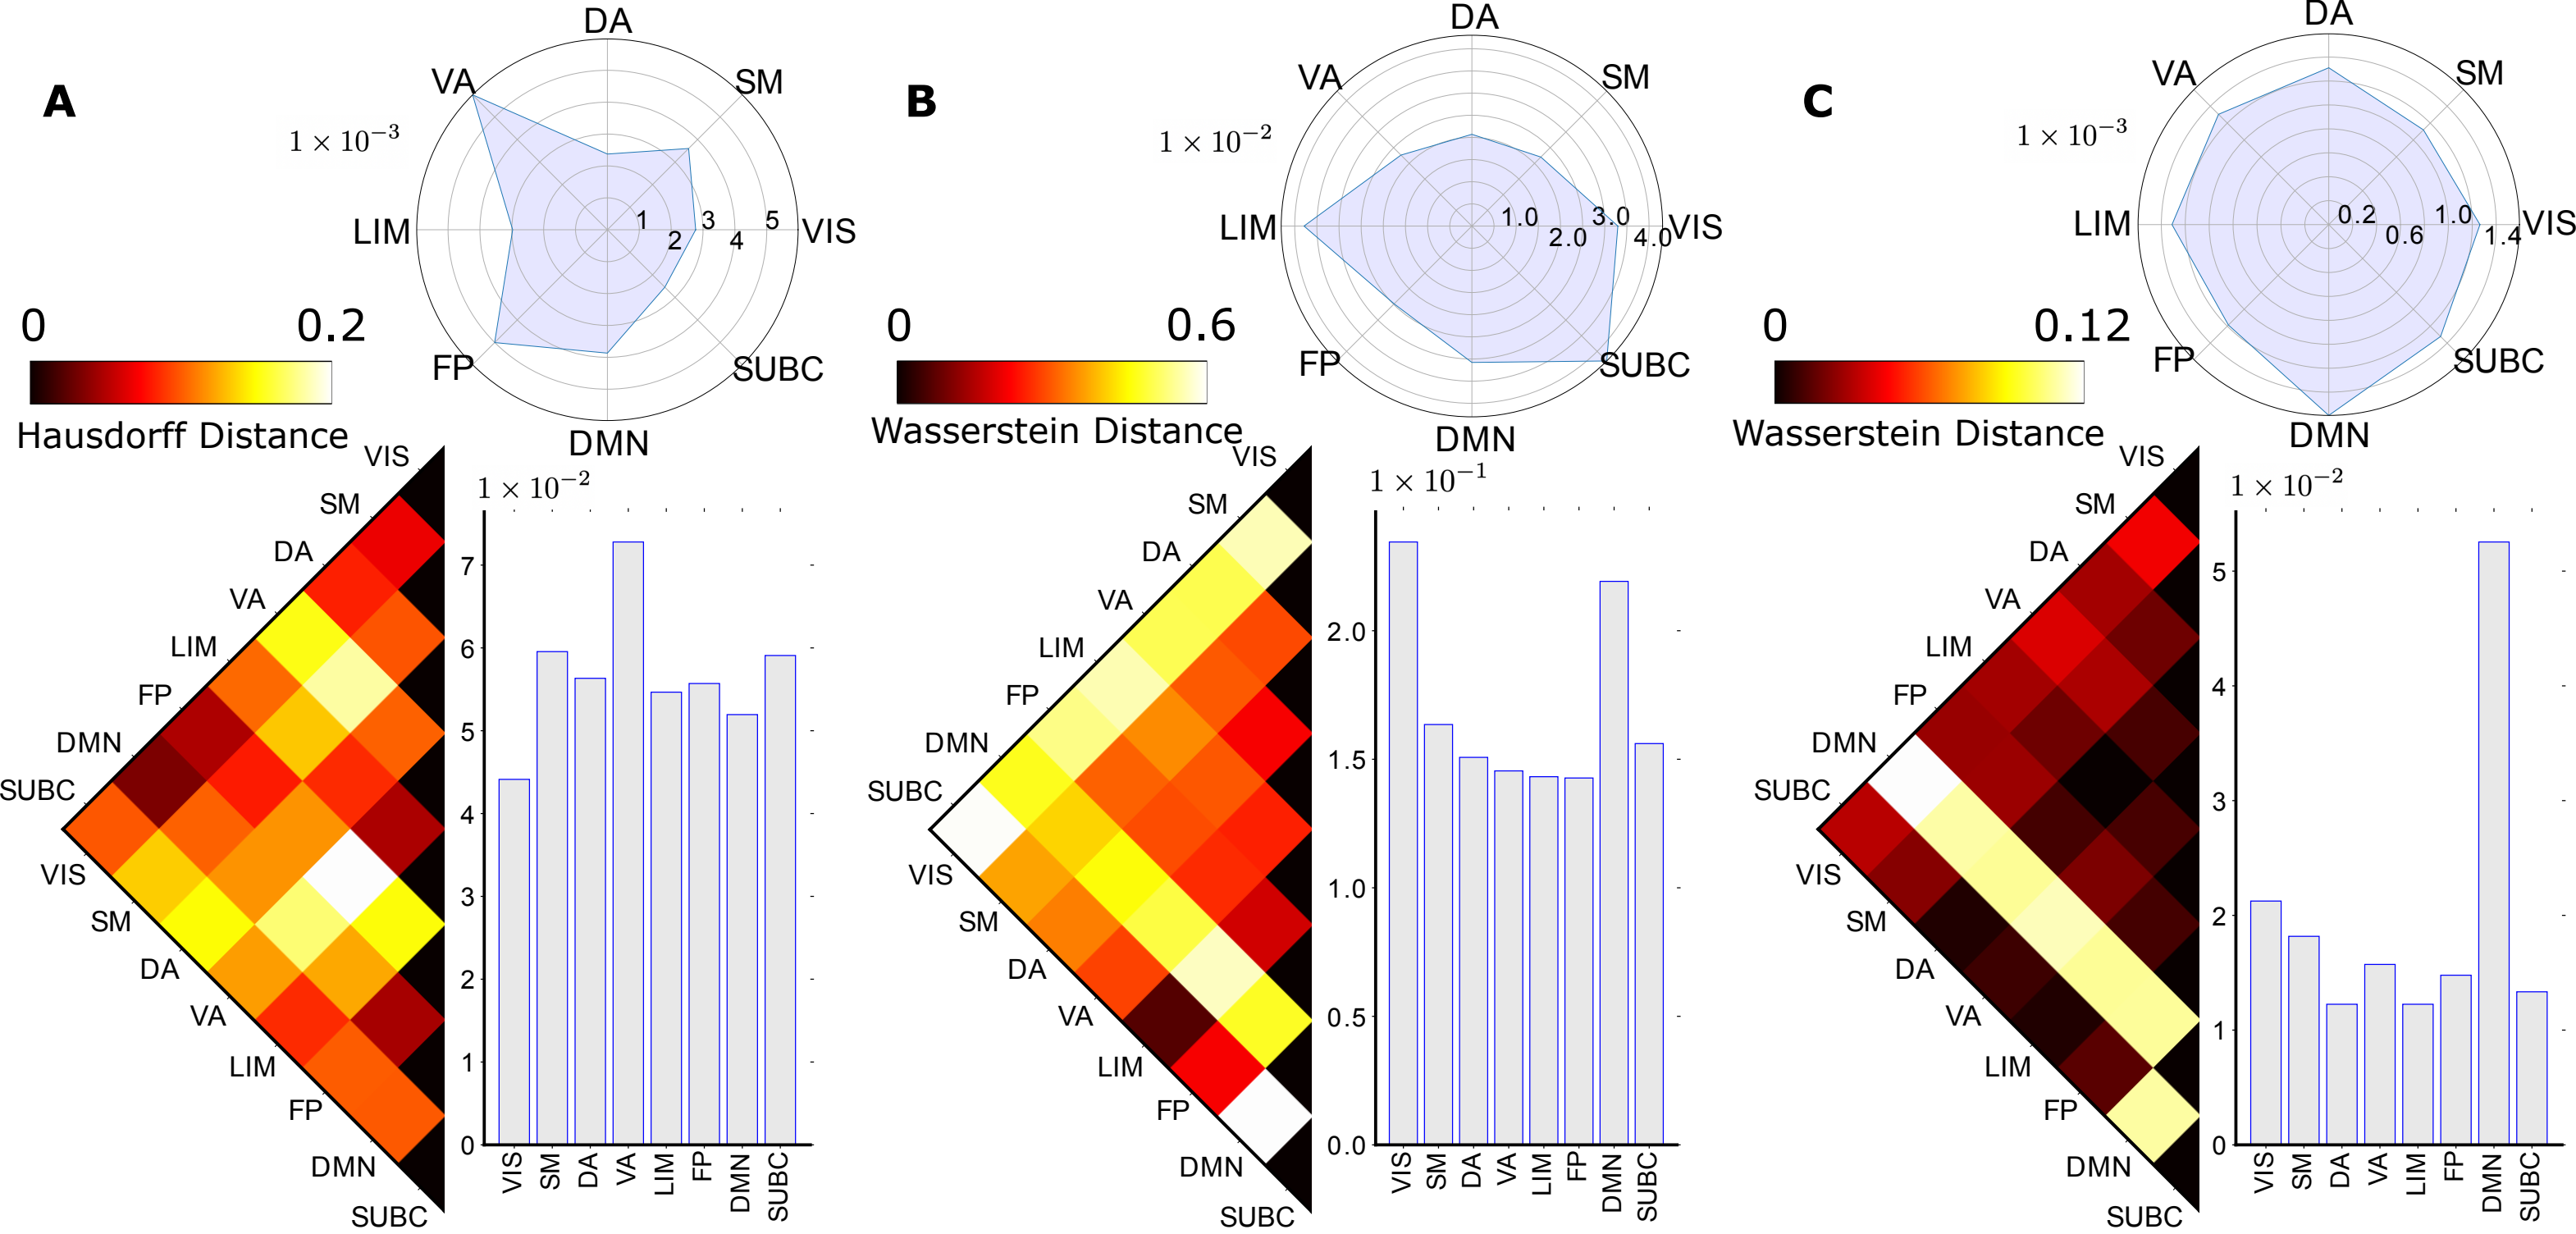

Supplement: s1 [file s1]

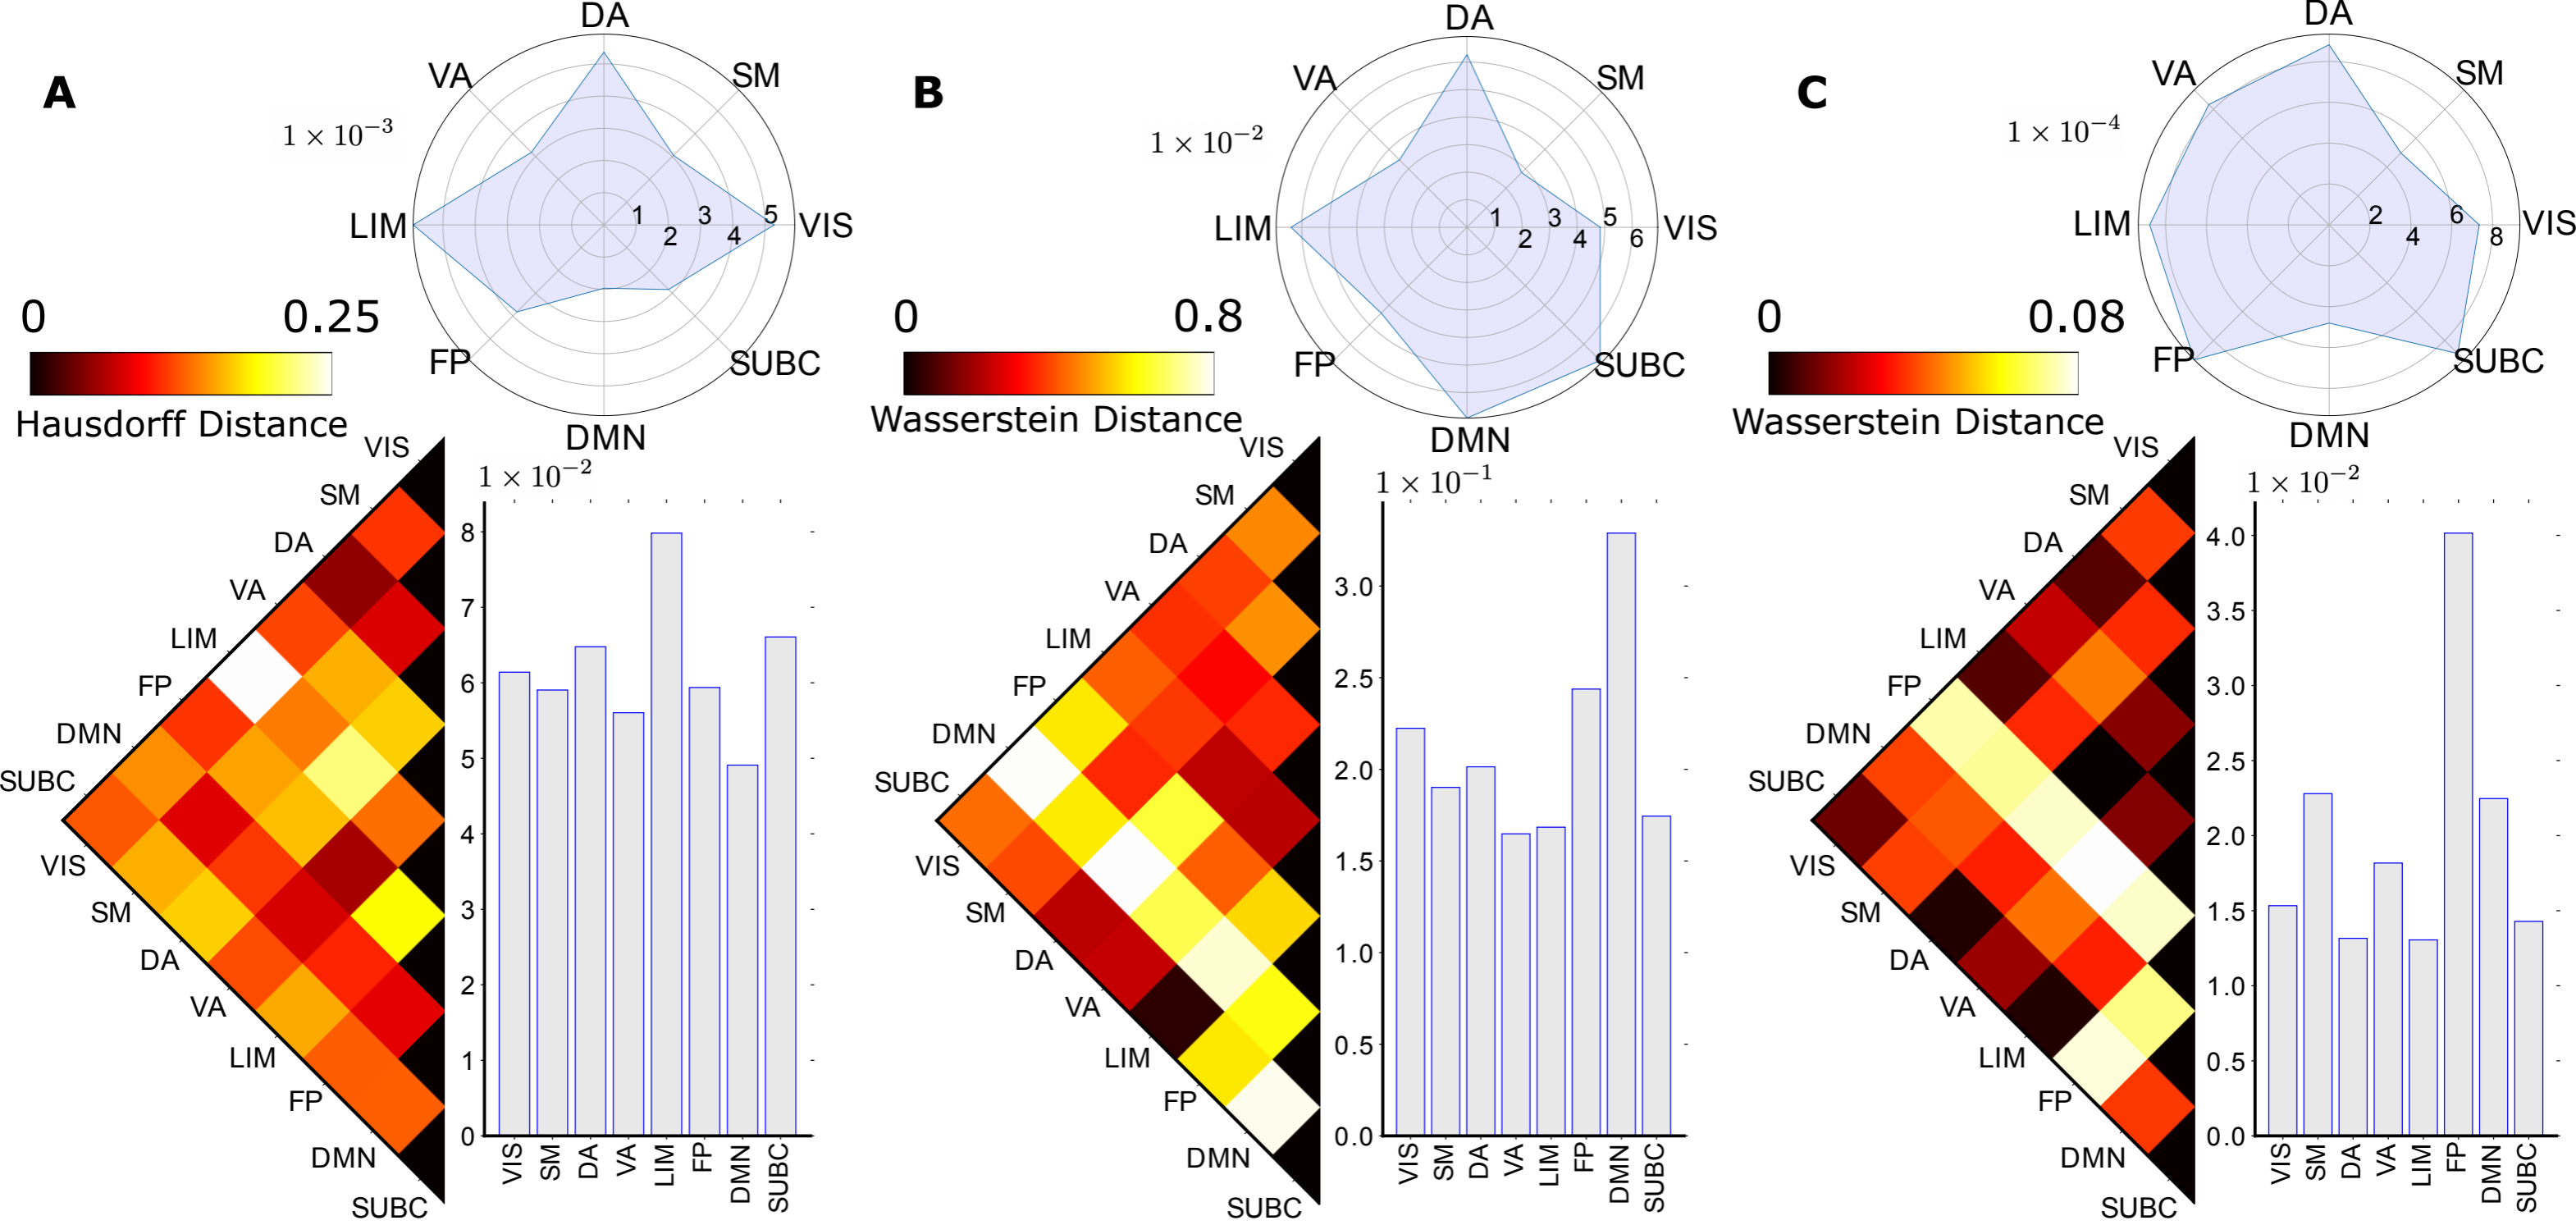

Supplement: s1 [file s1]

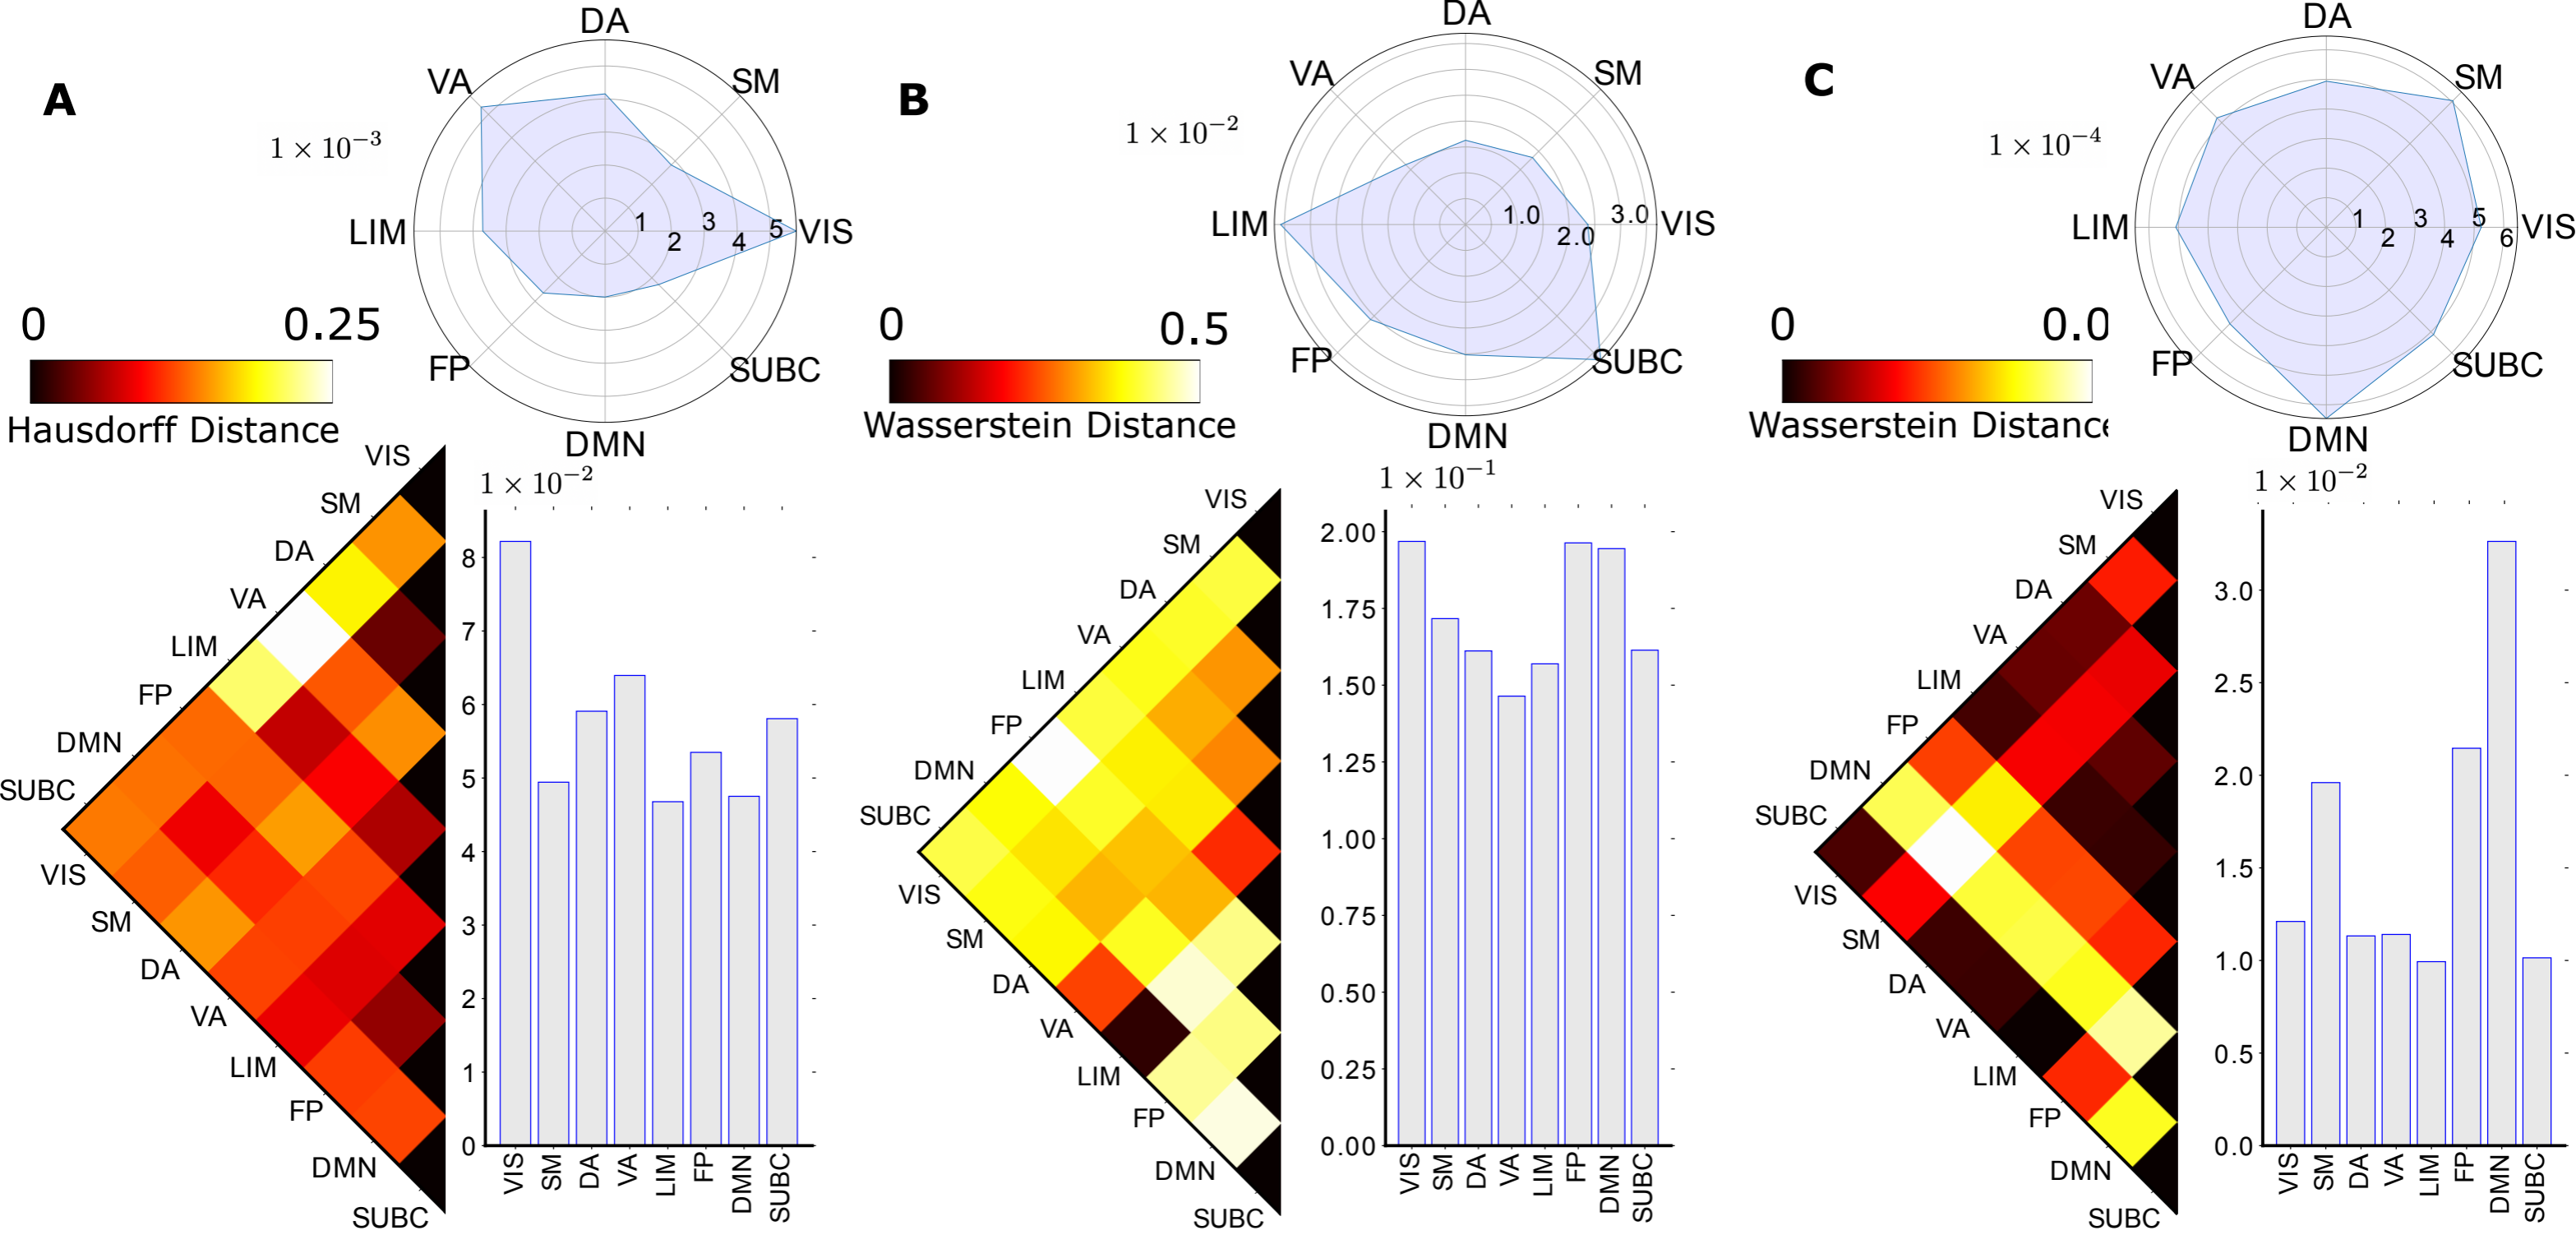

Supplement: s1 [file s1]

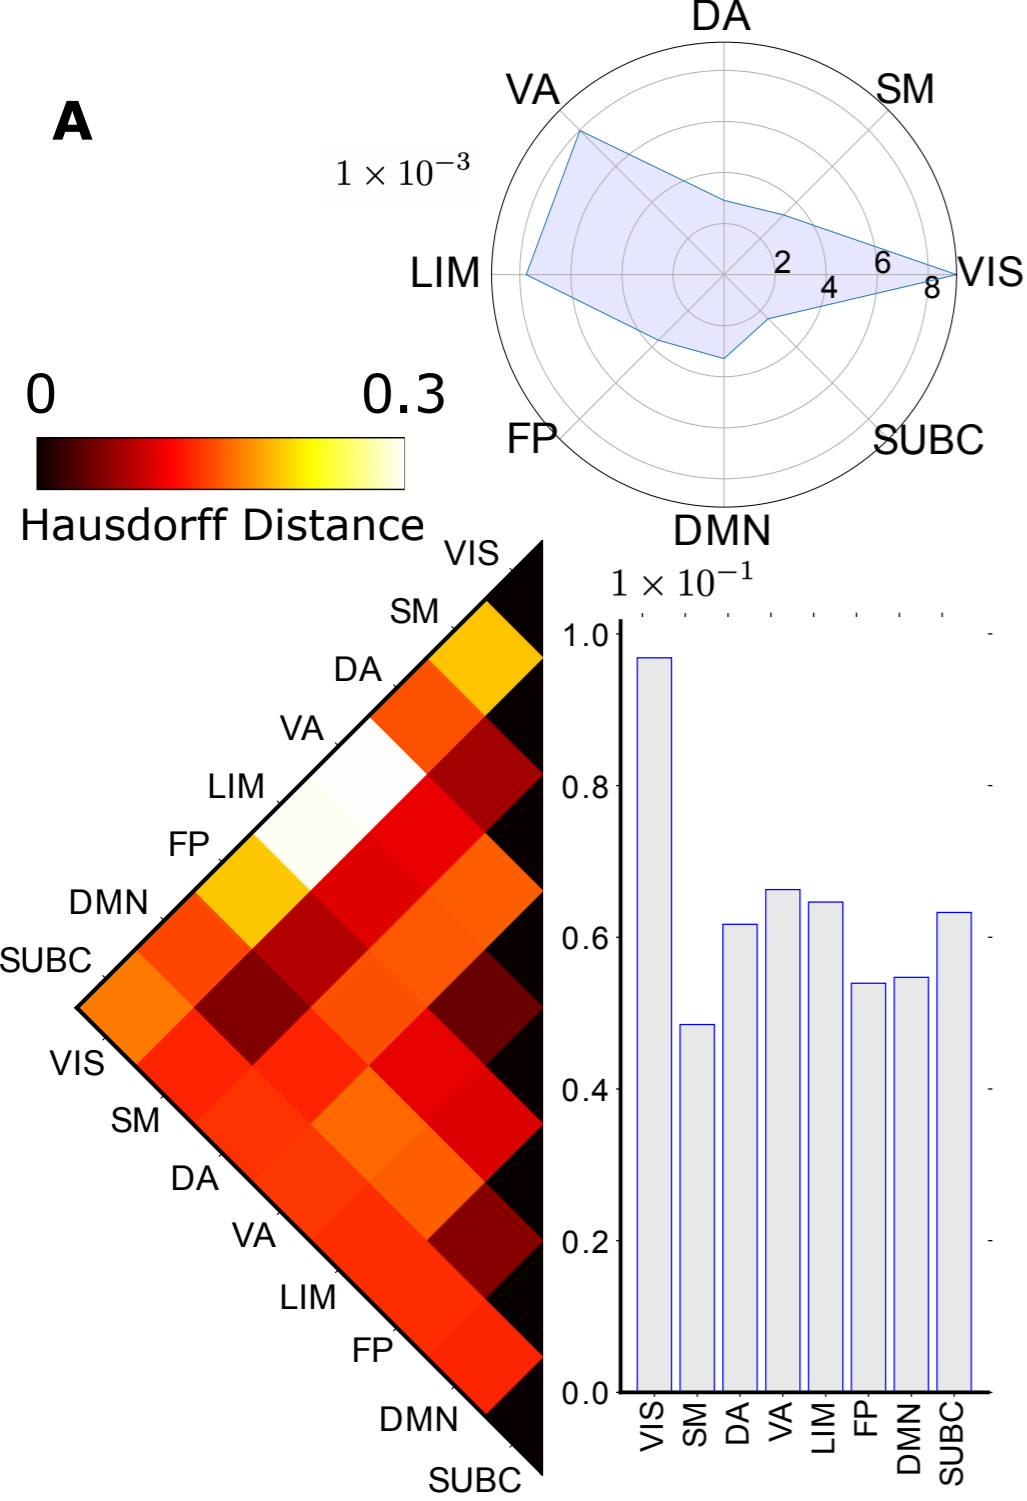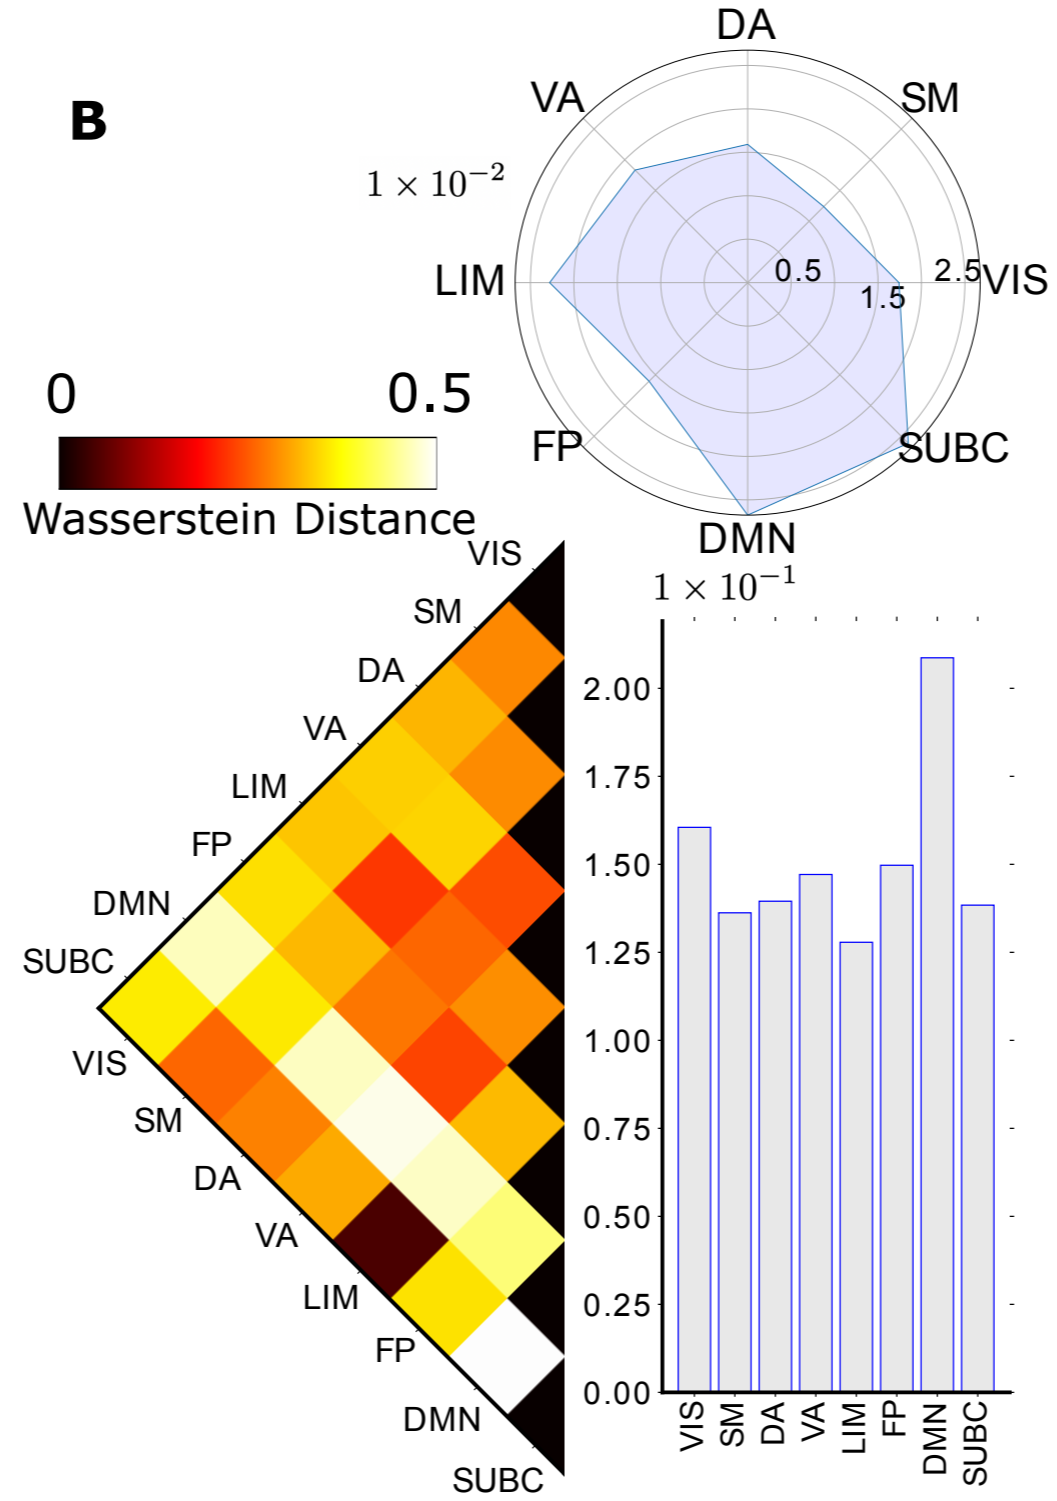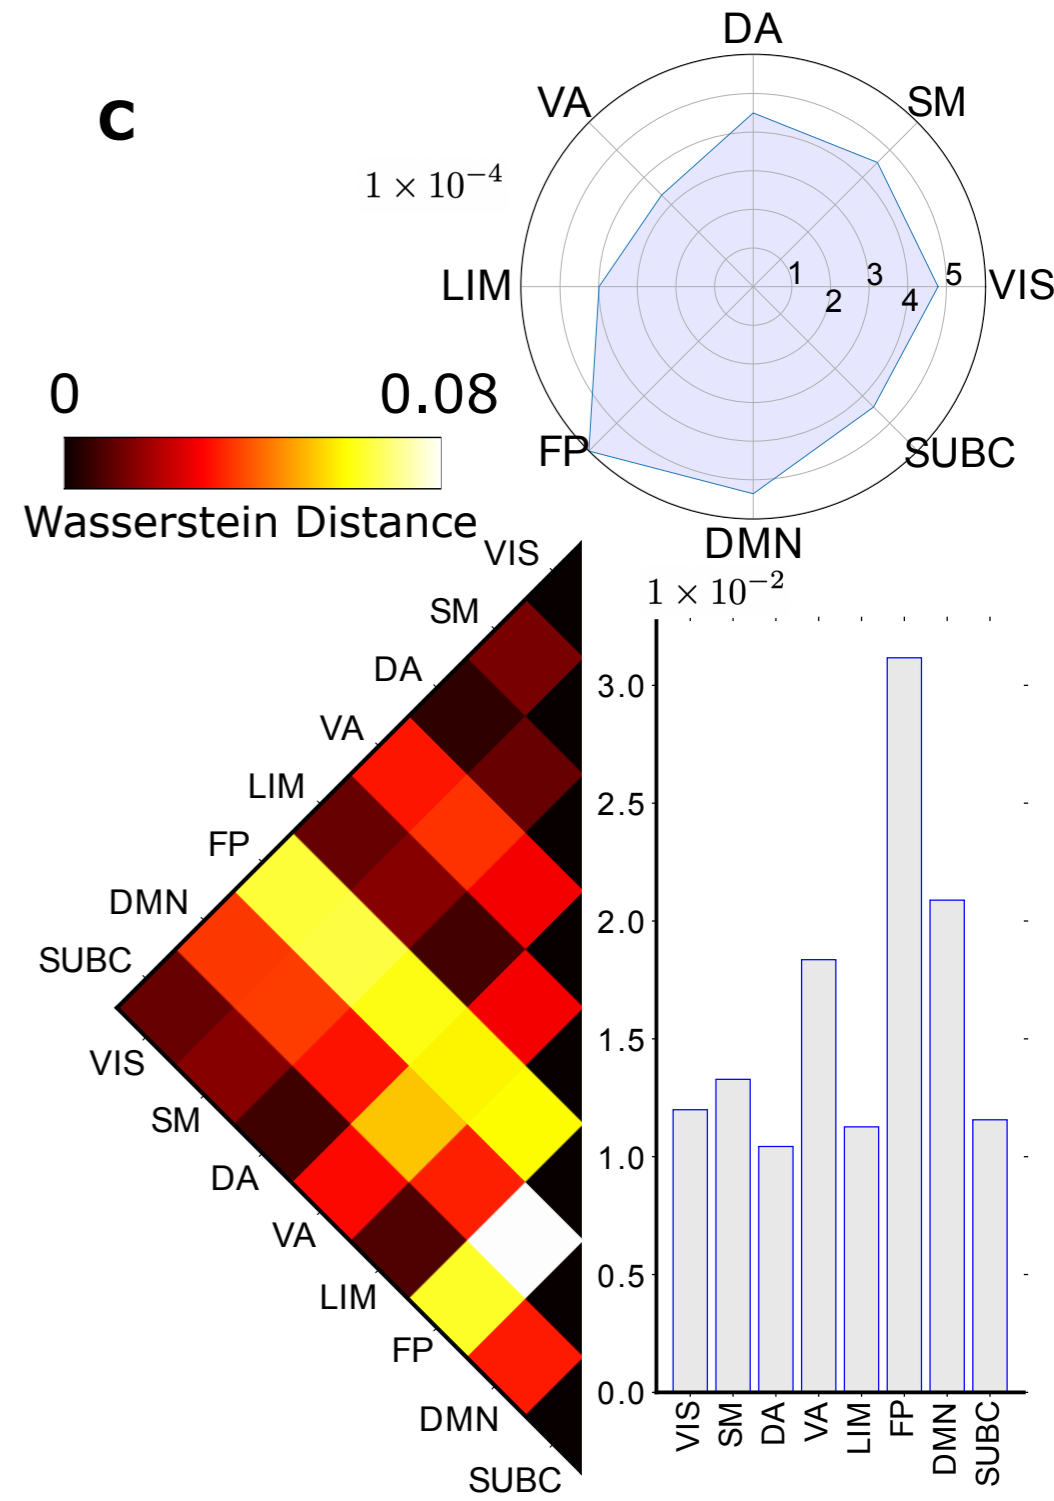

Supplement: s1 [file s1]

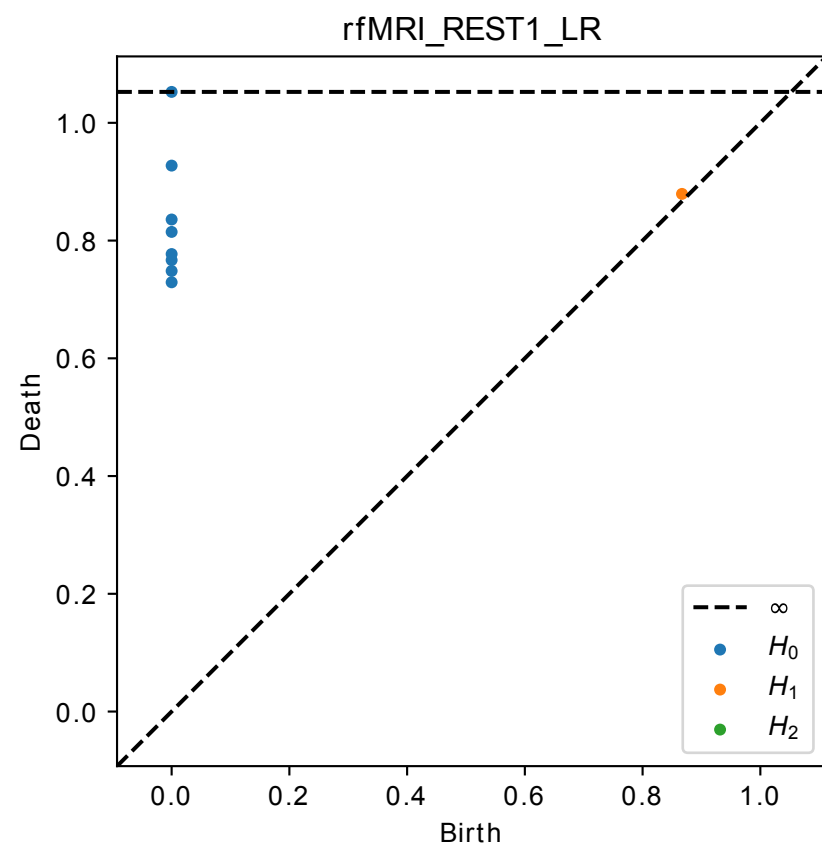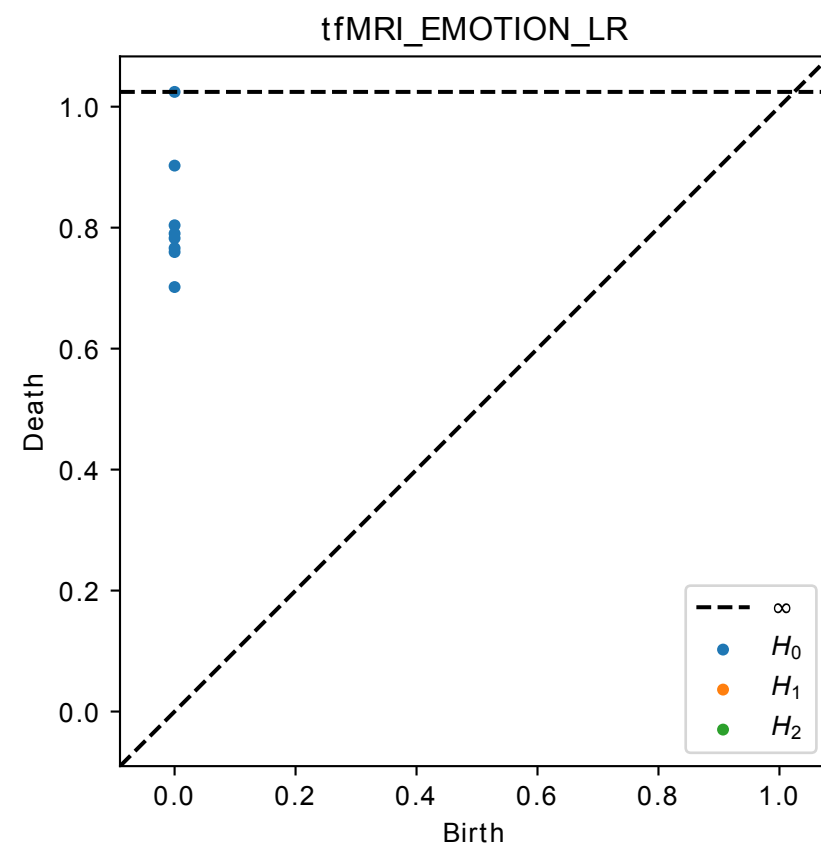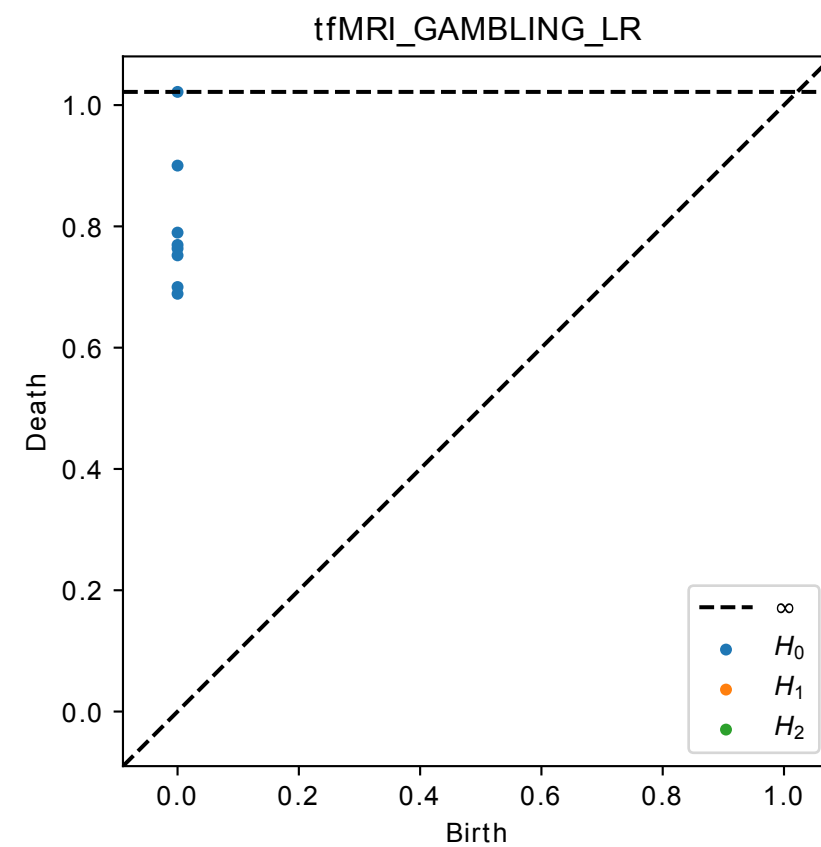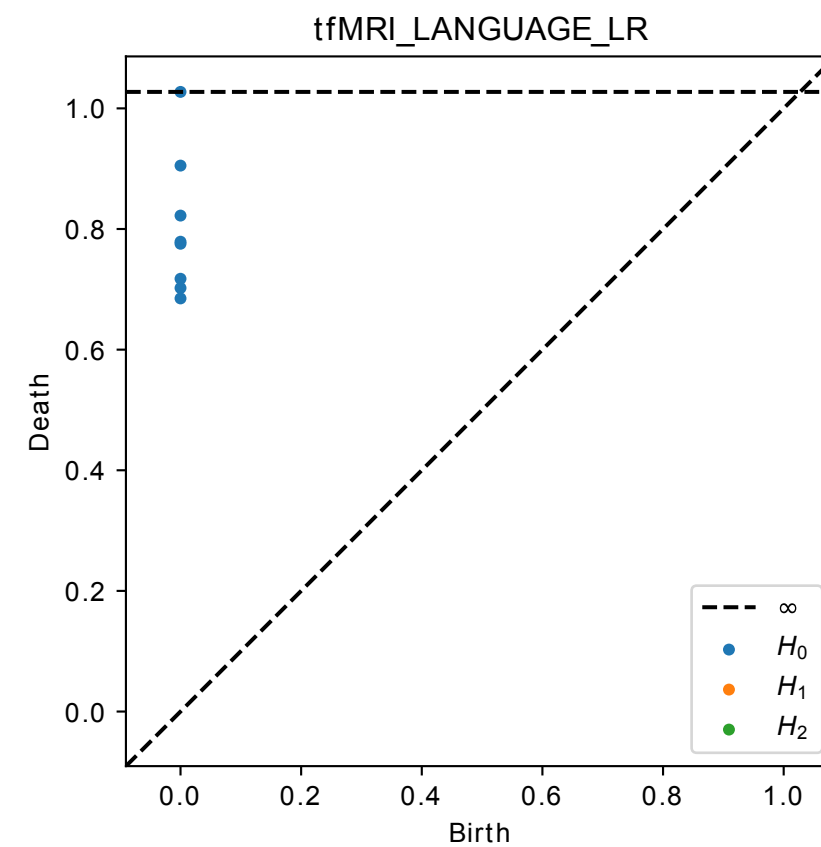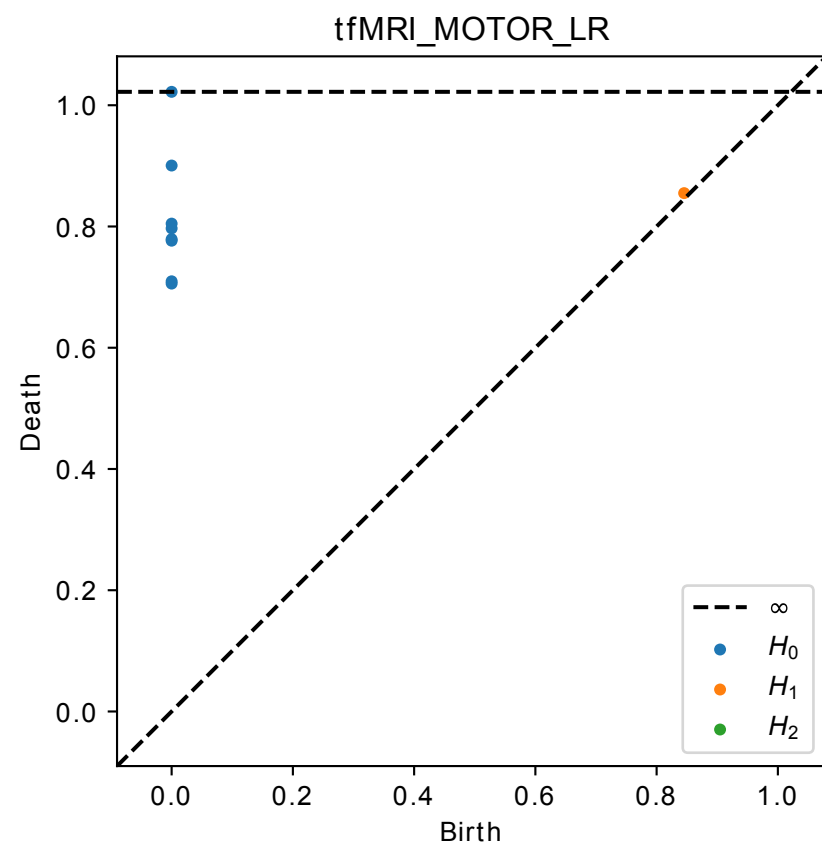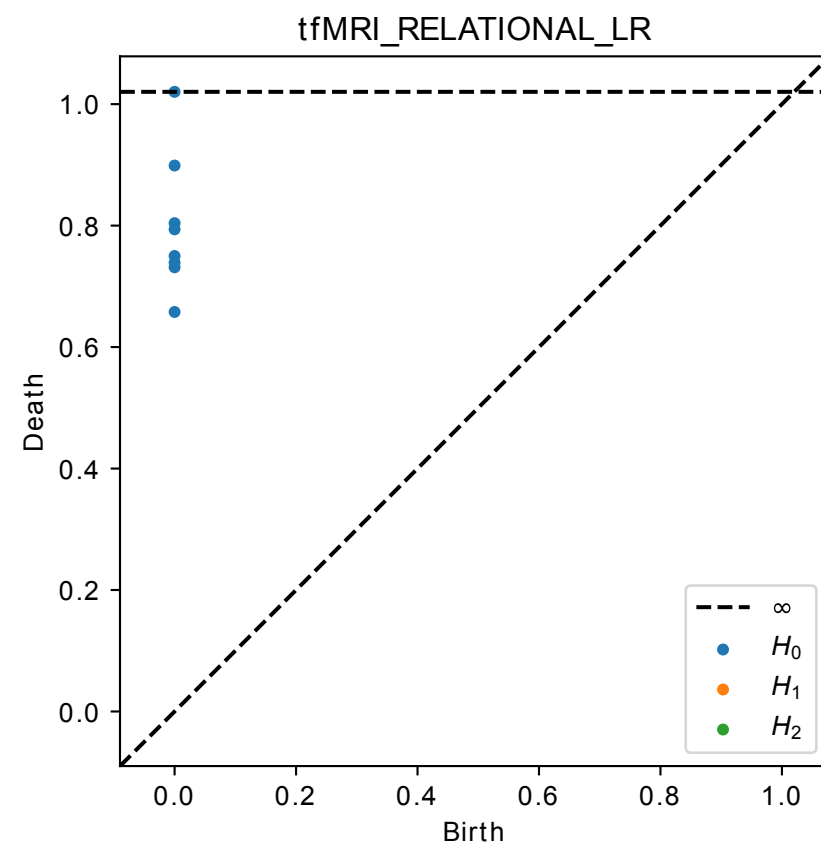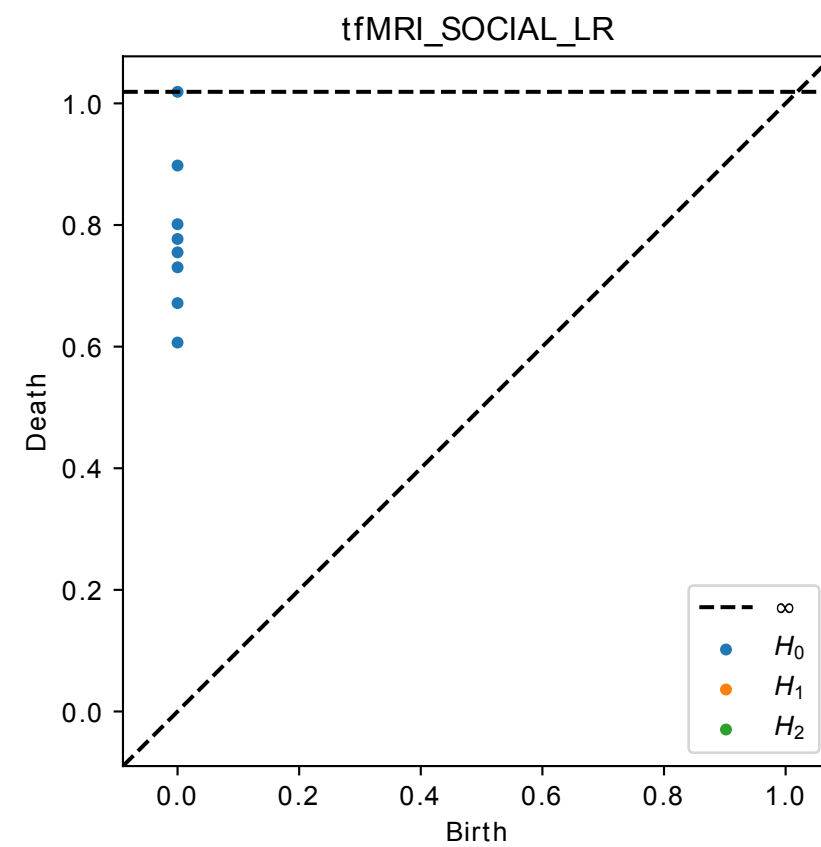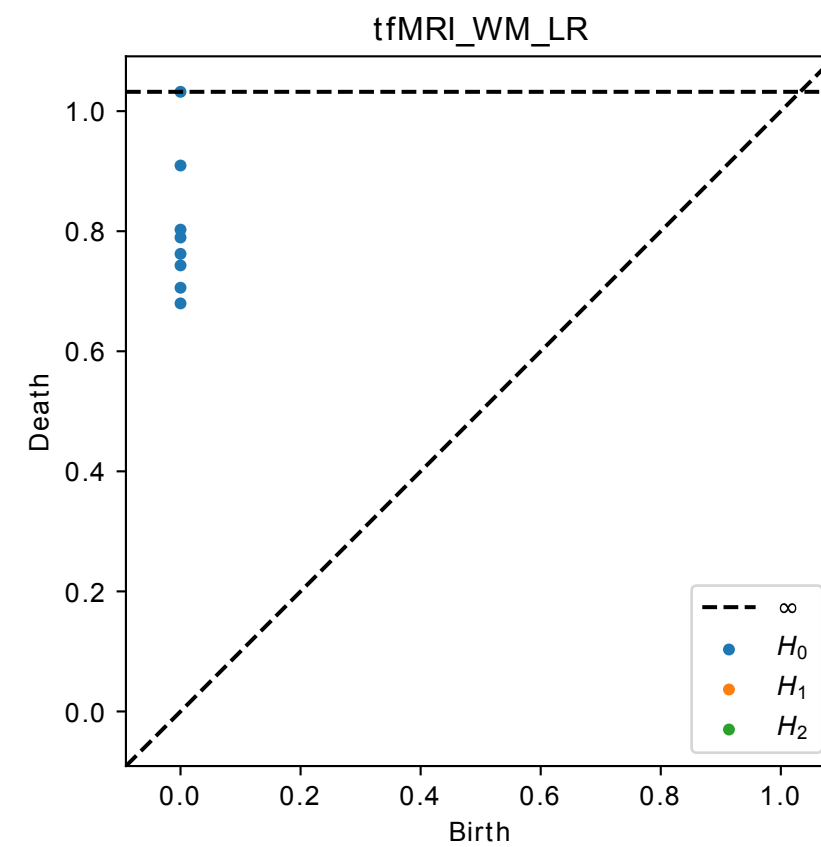

Supplement: s1 [file s1]

H0

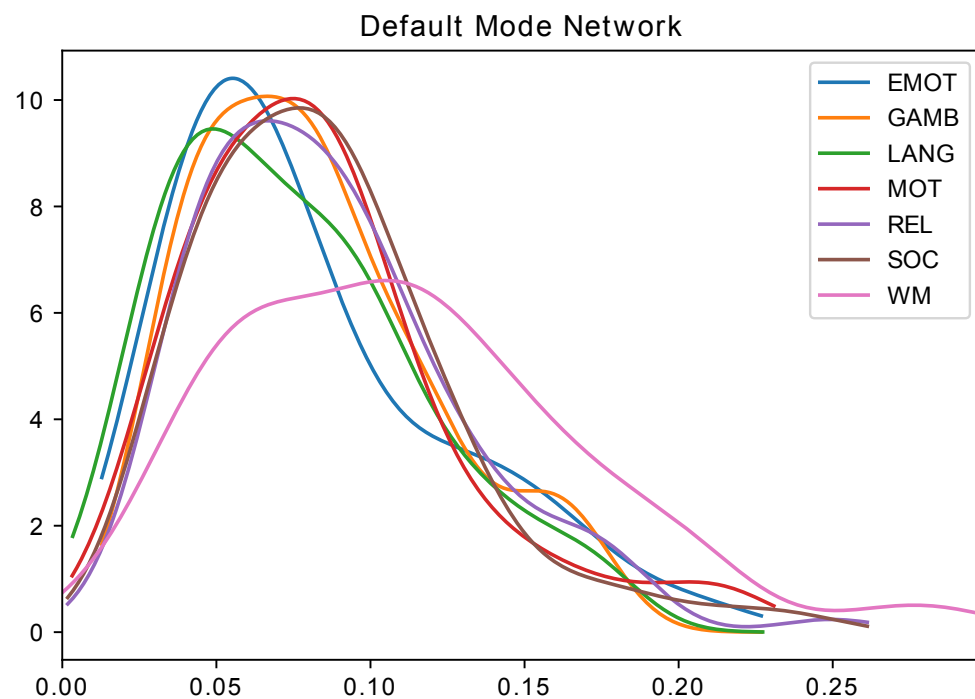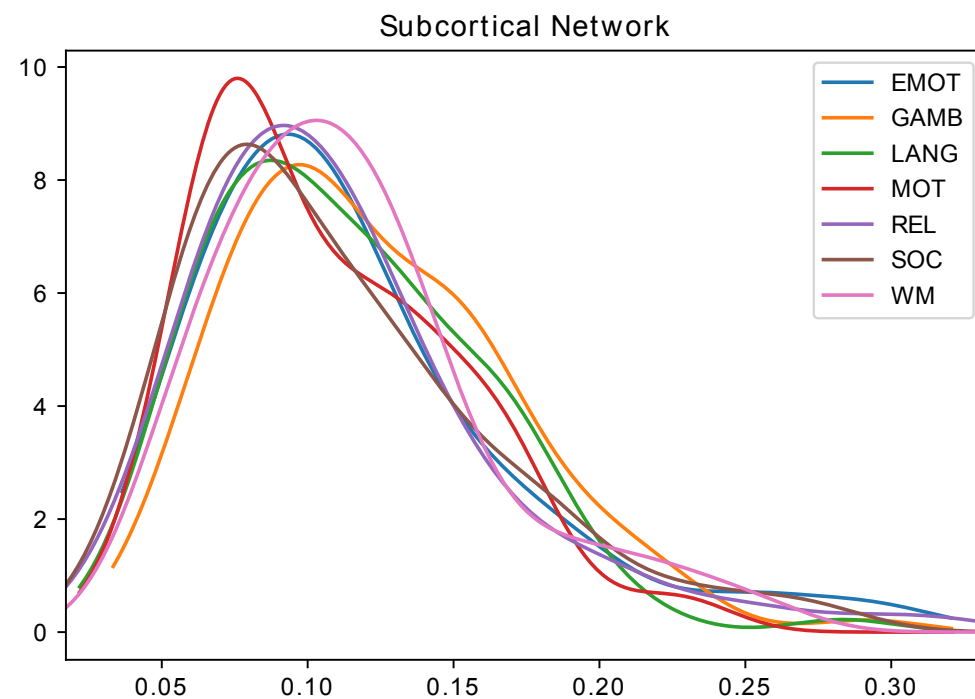

H1

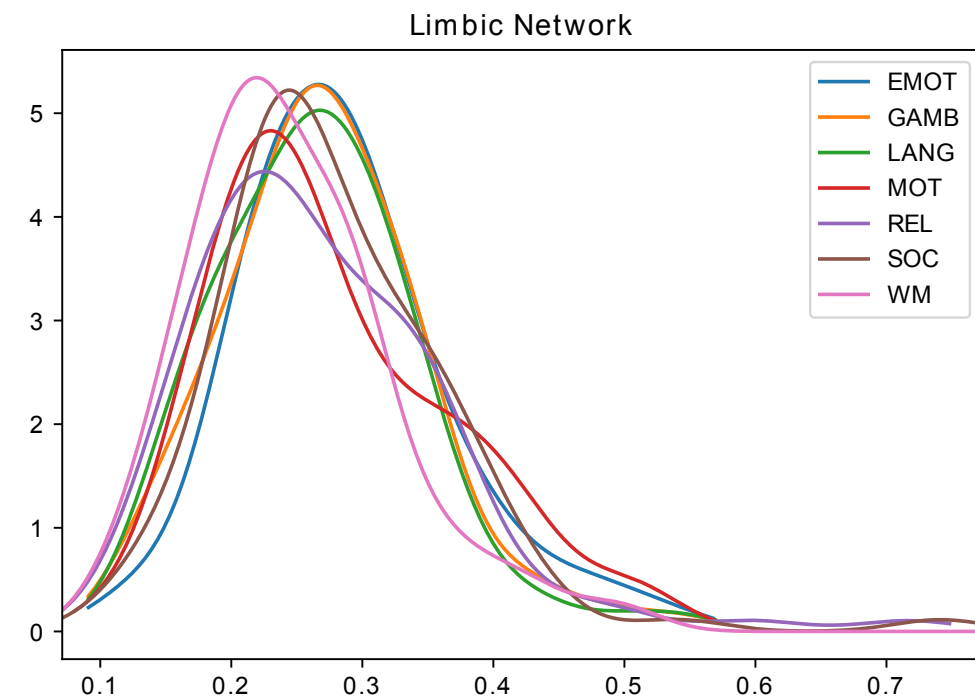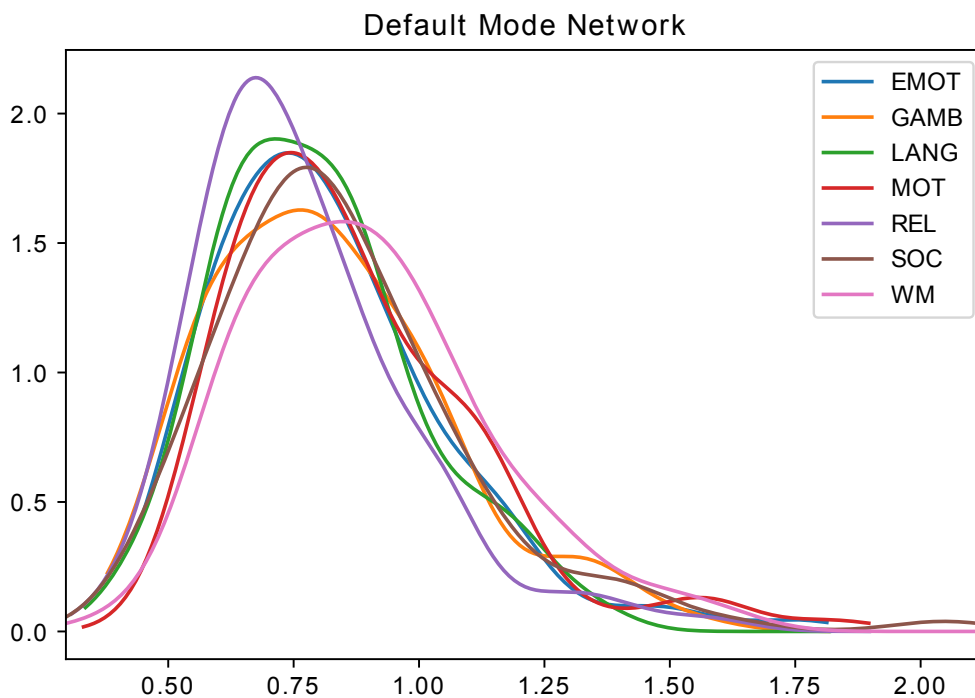

H2

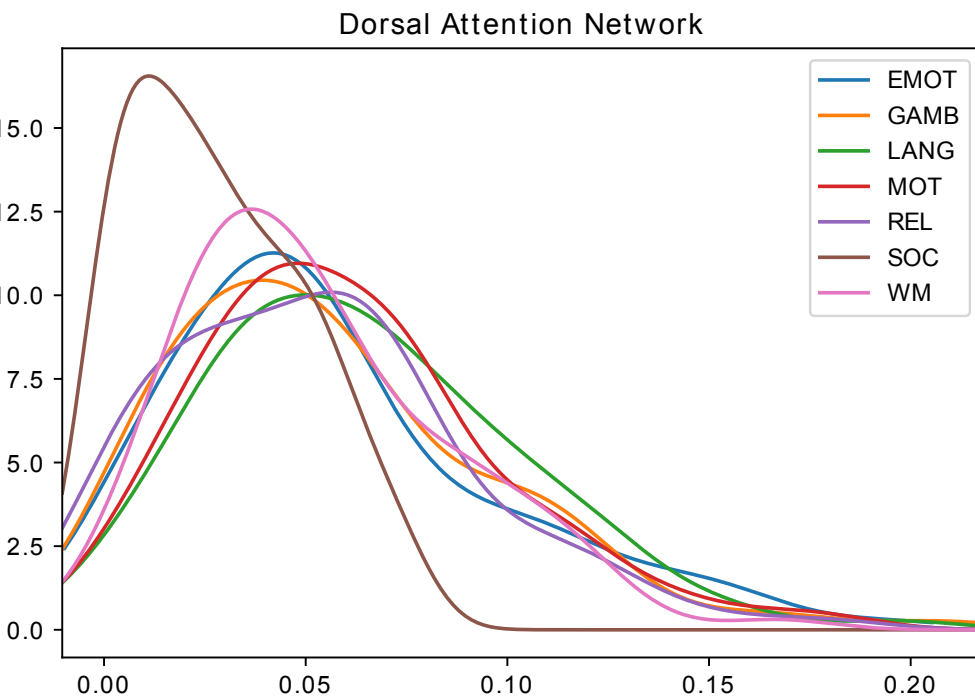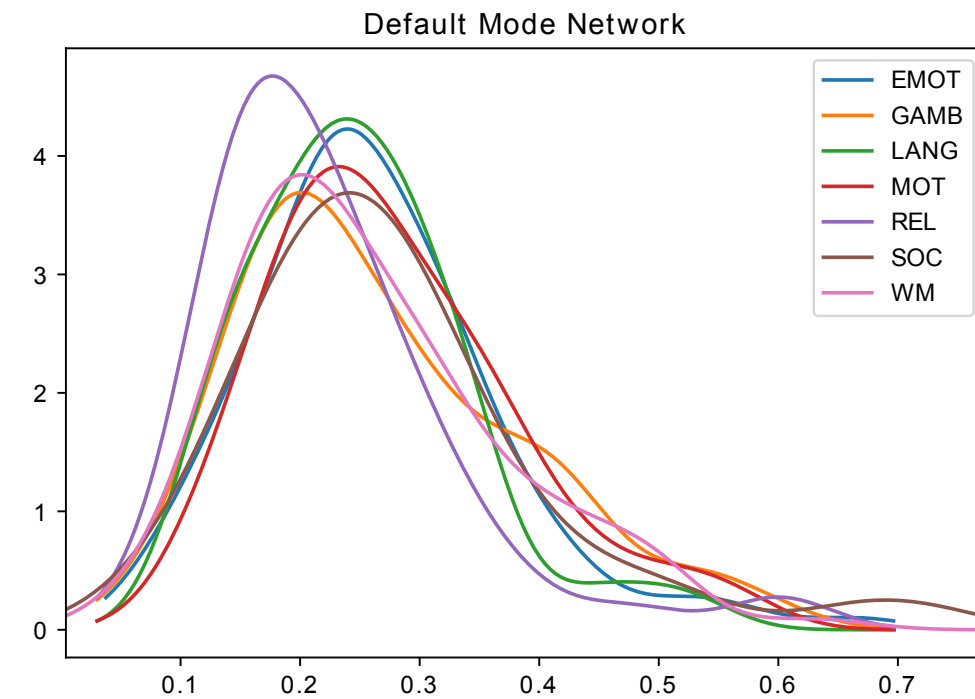

Supplement: s1 [file s1]

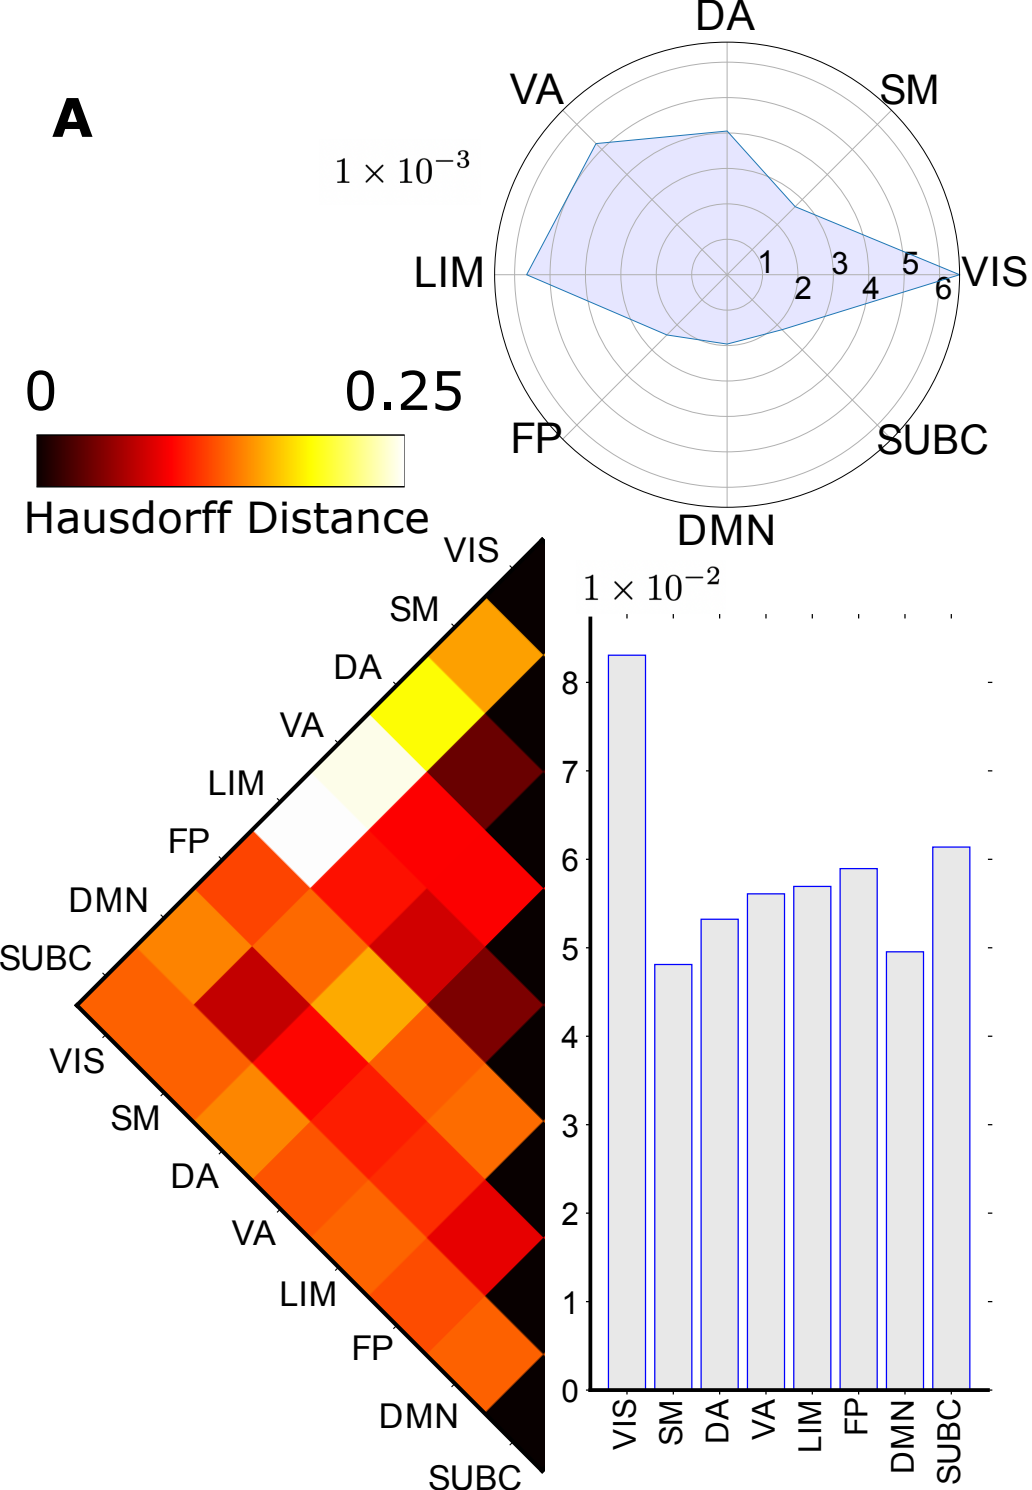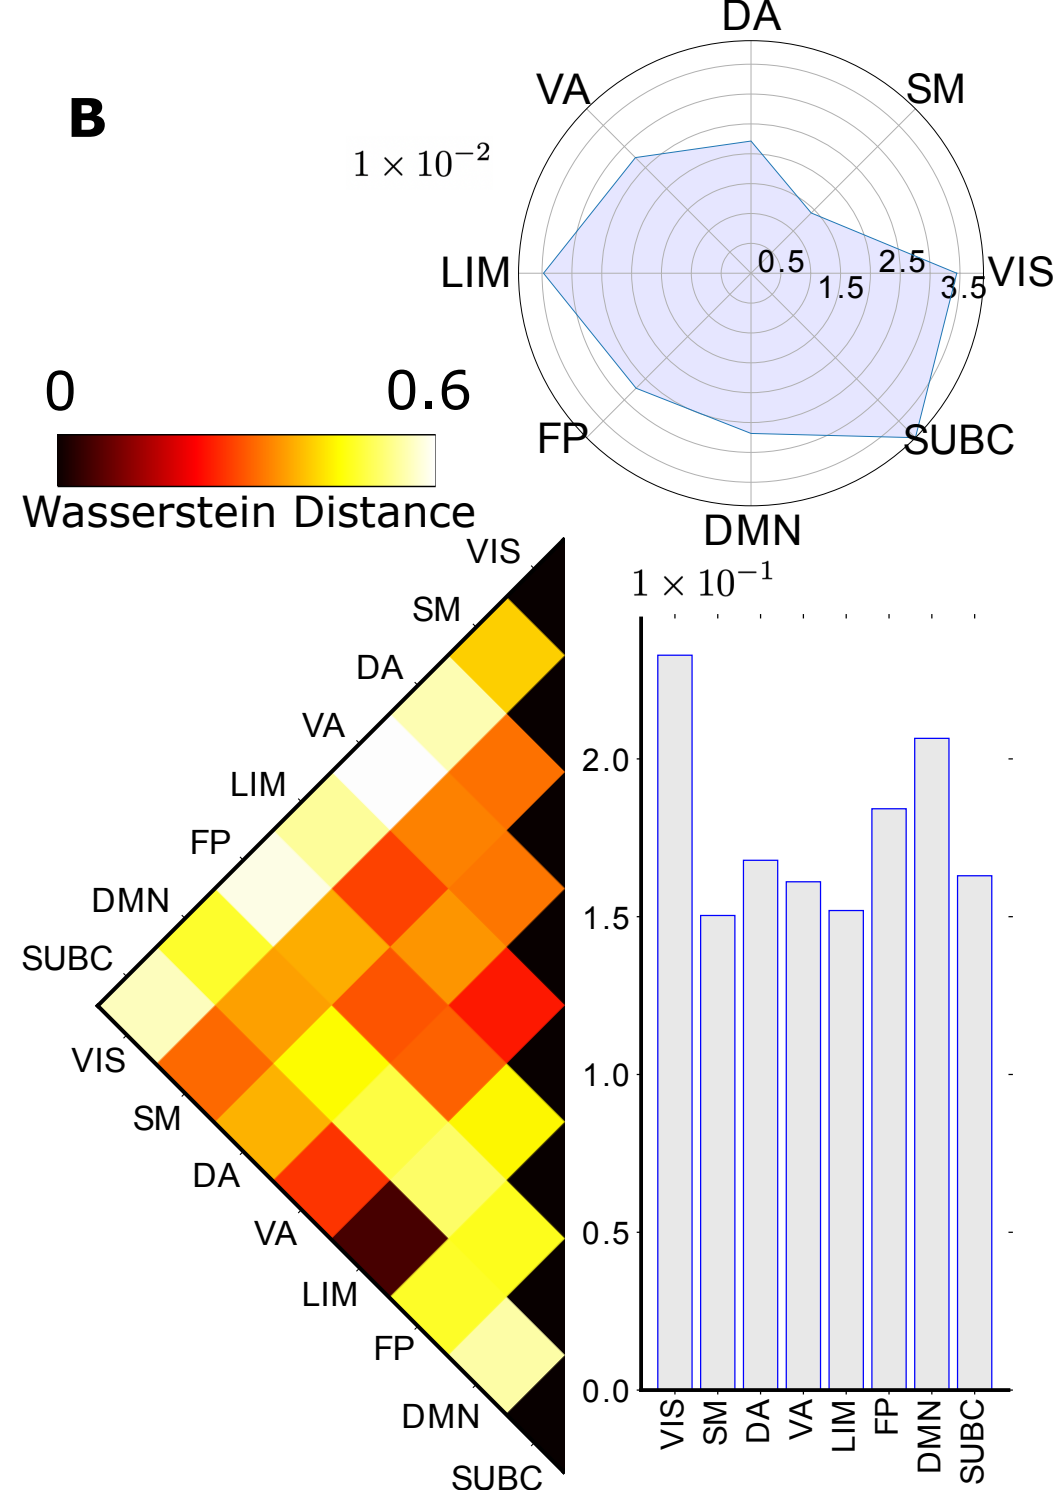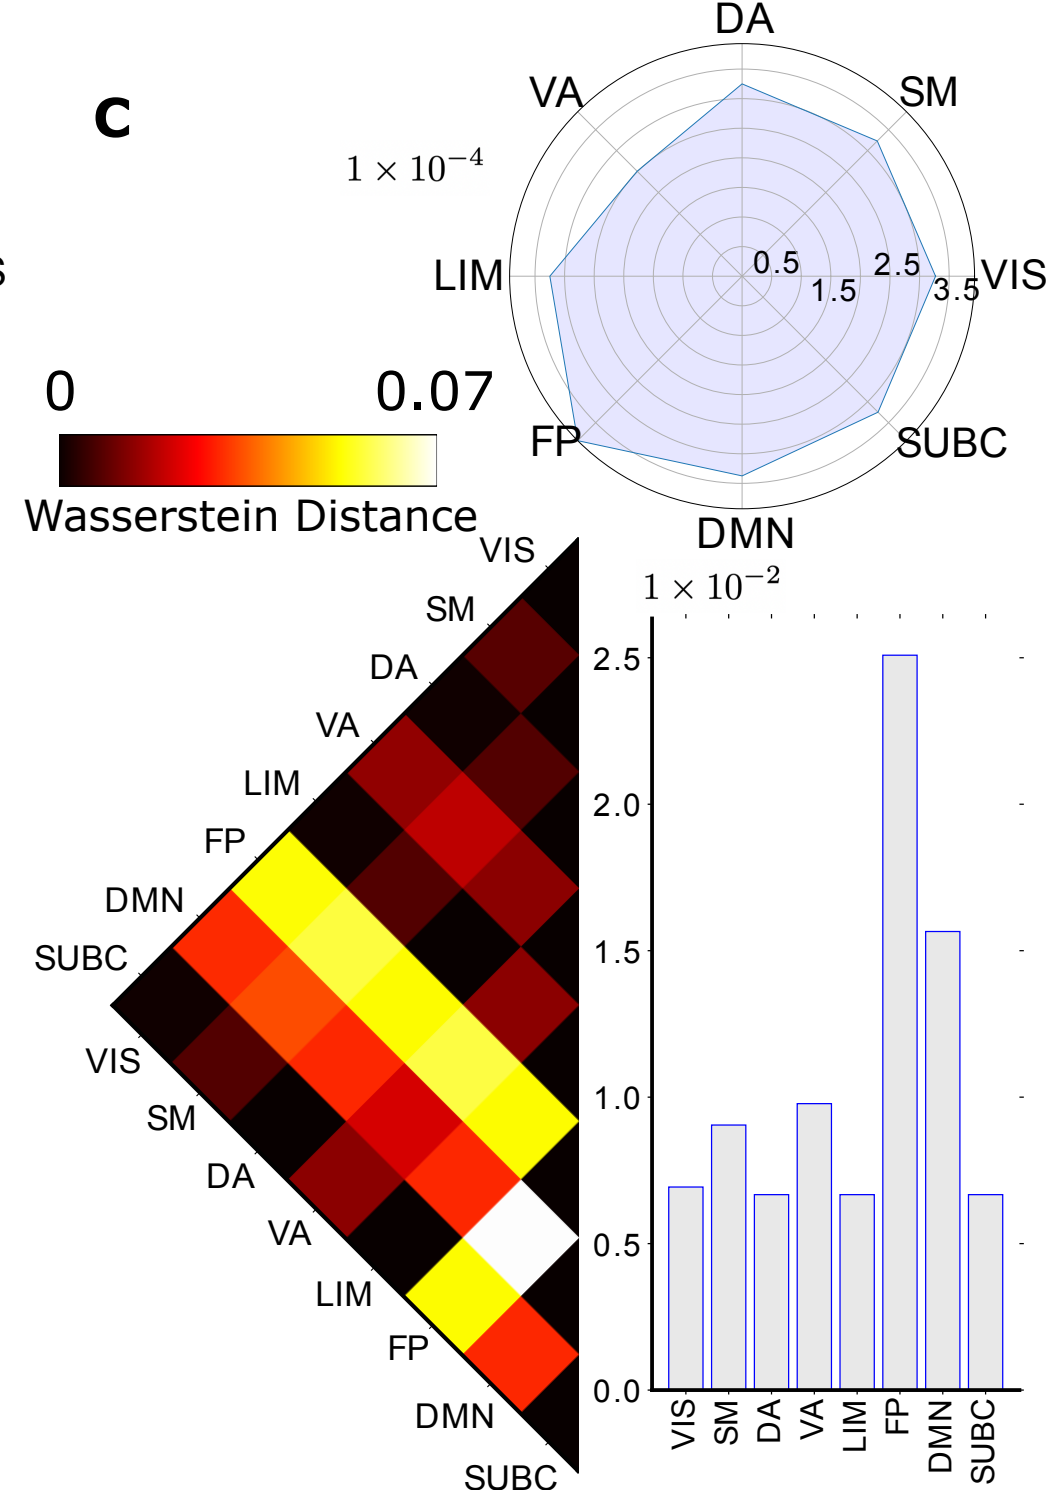

Supplement: s1 [file s1]

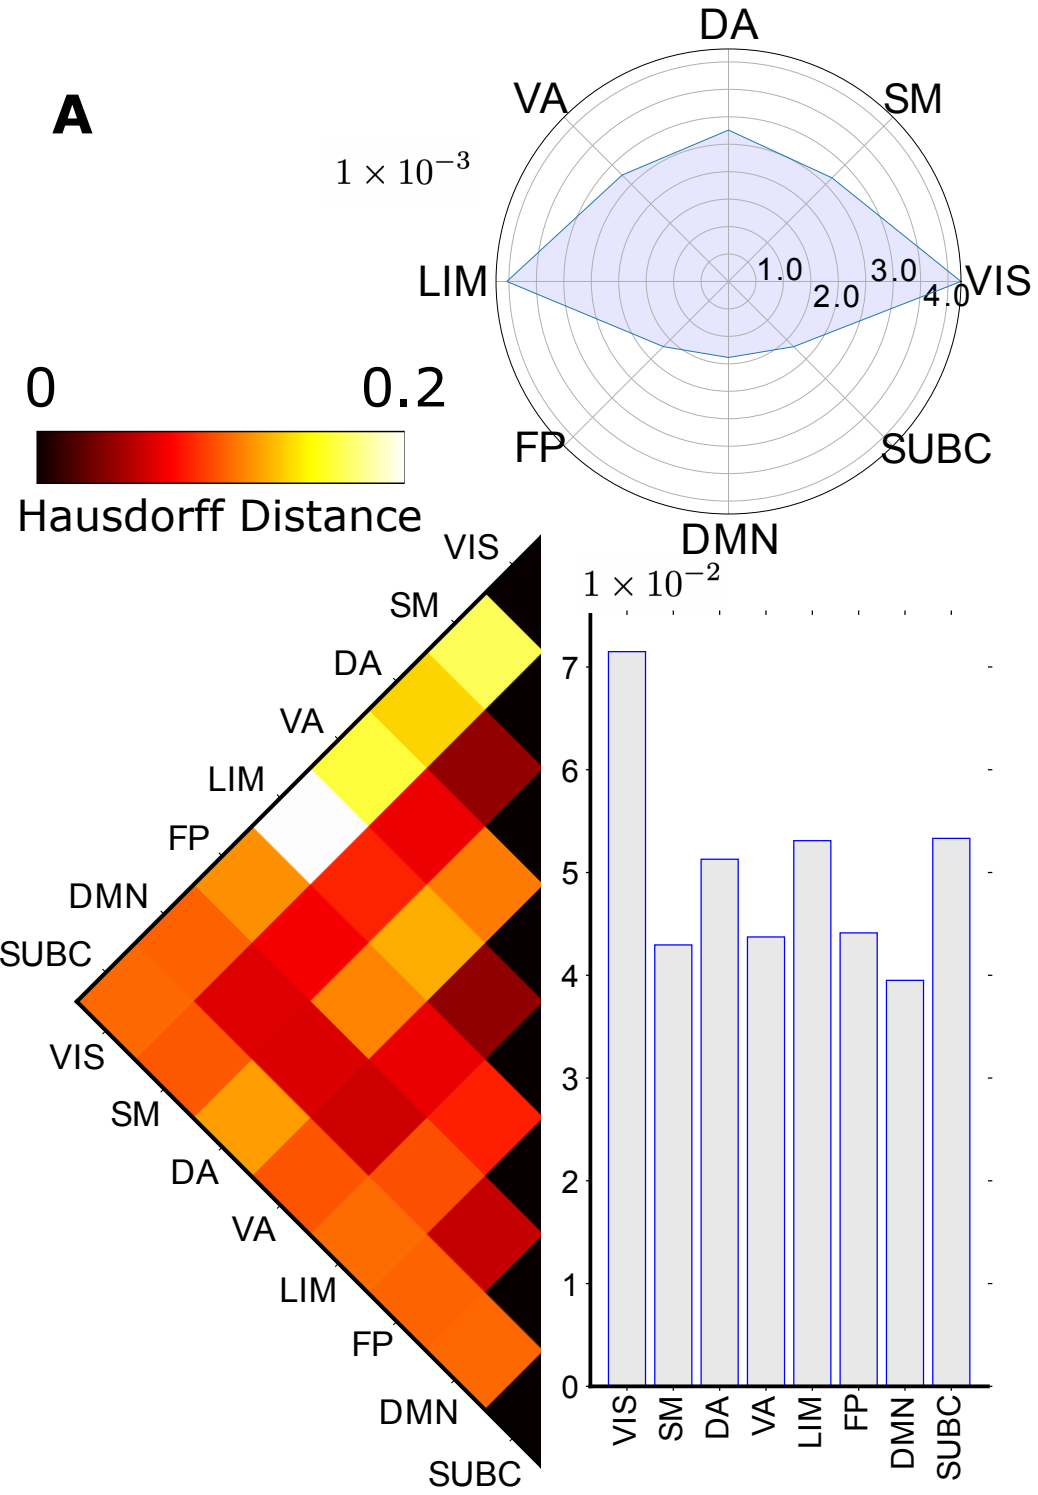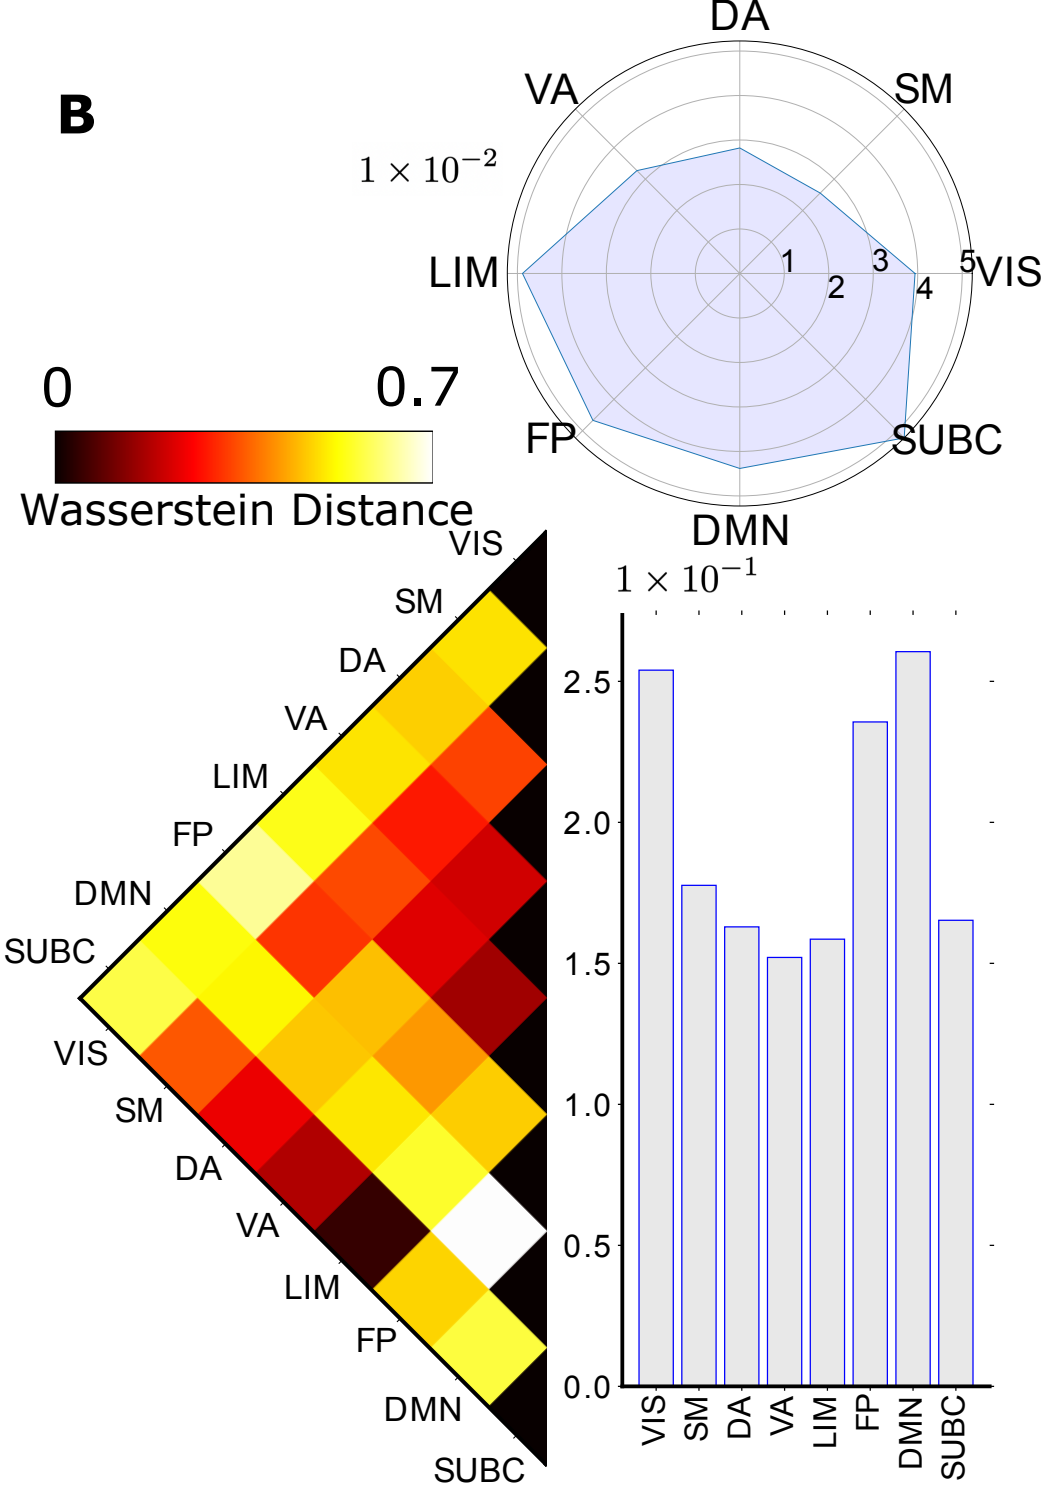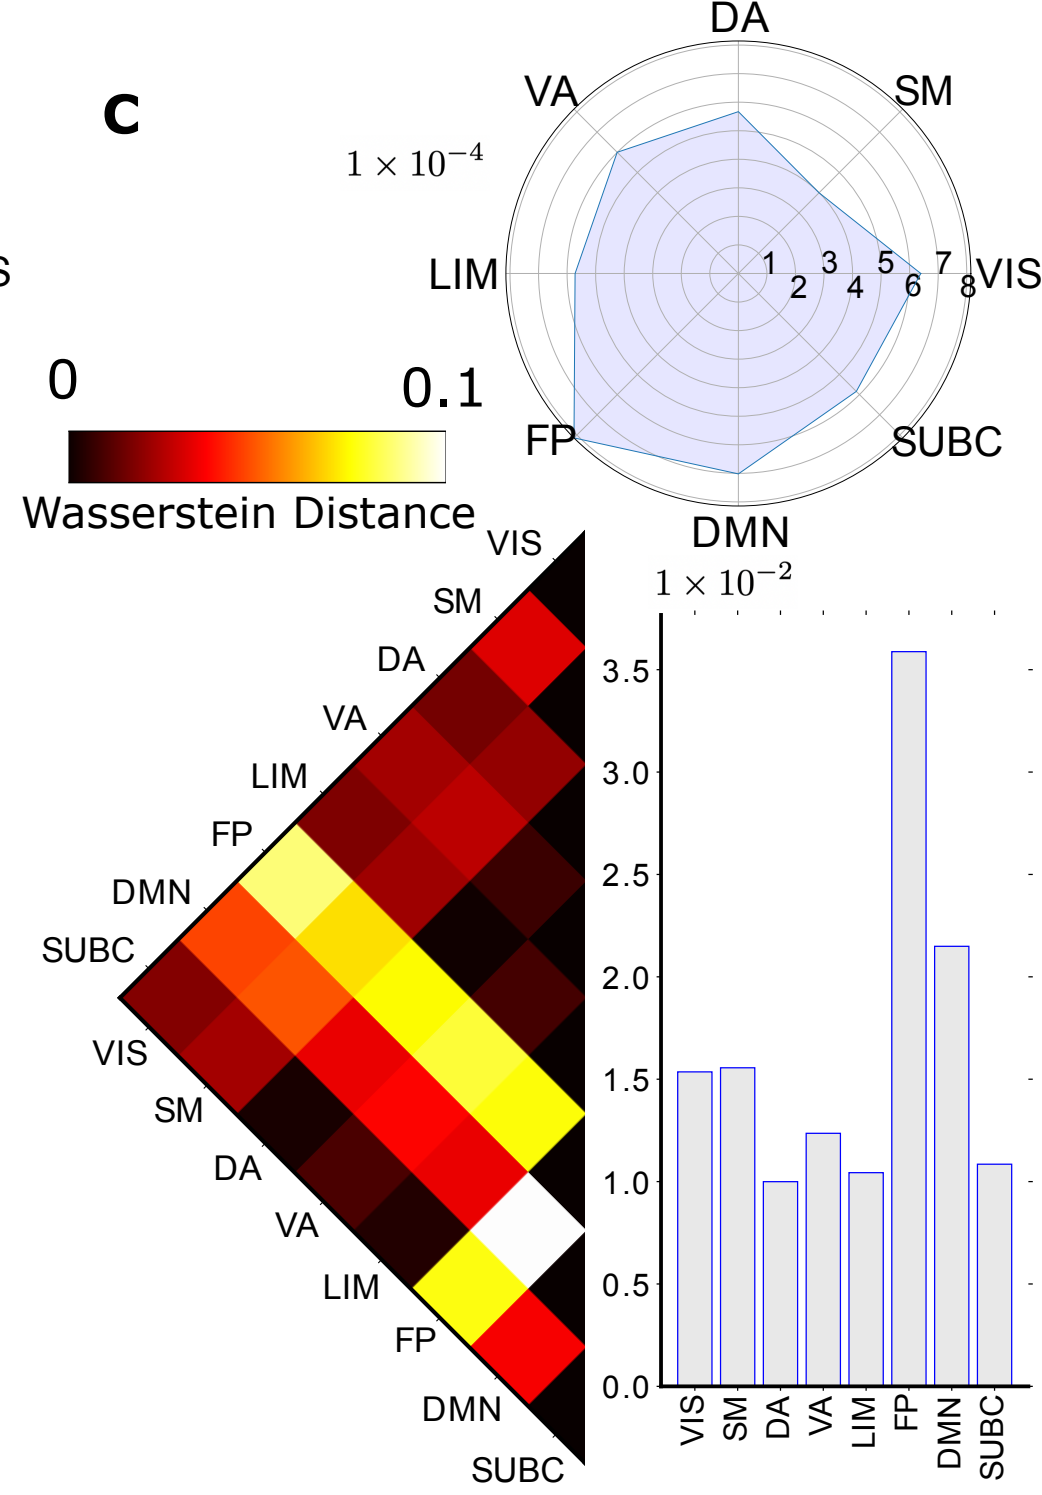

Supplement: s1 [file s1]

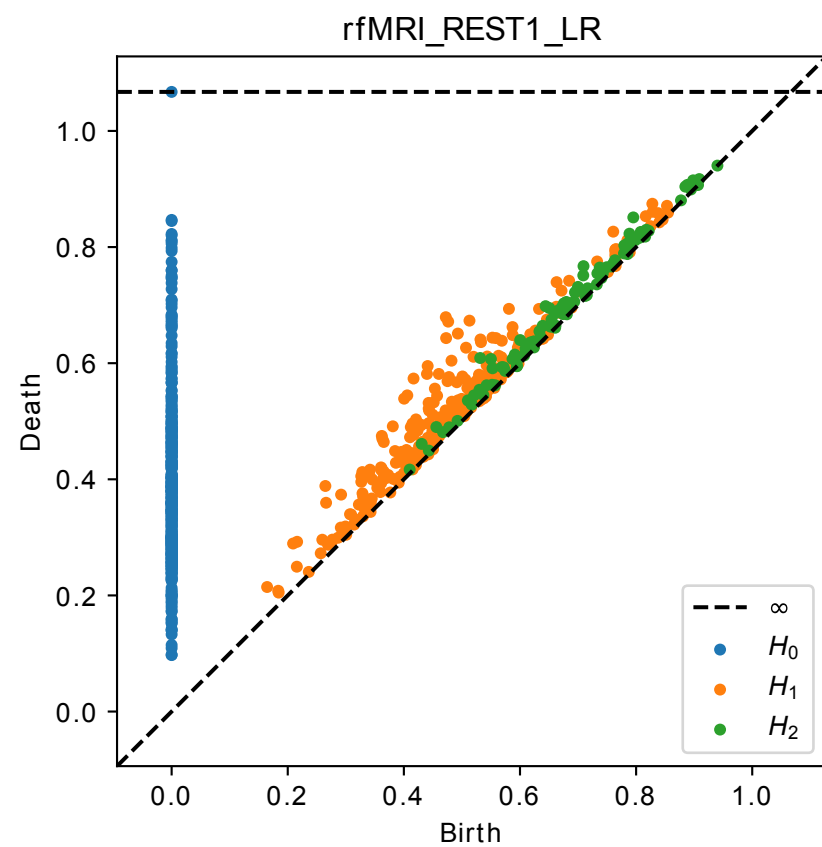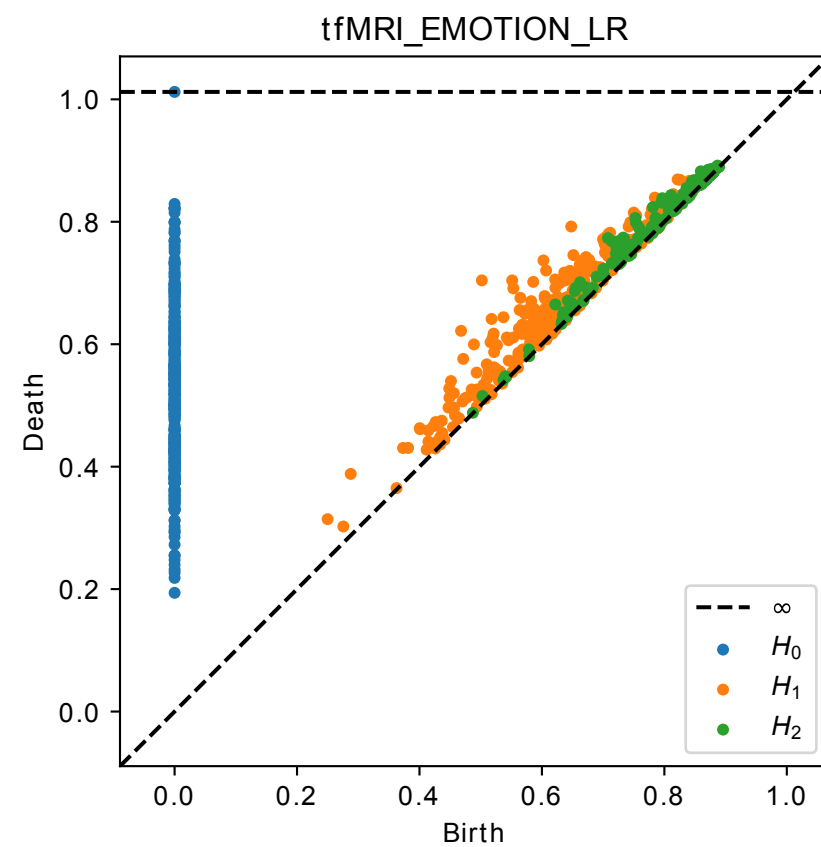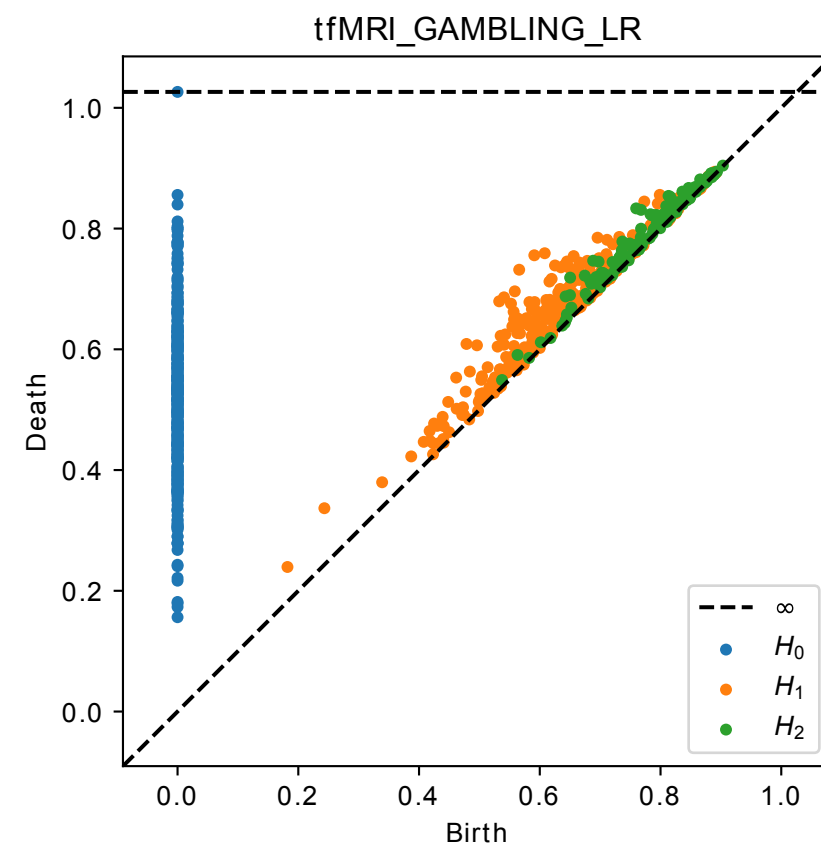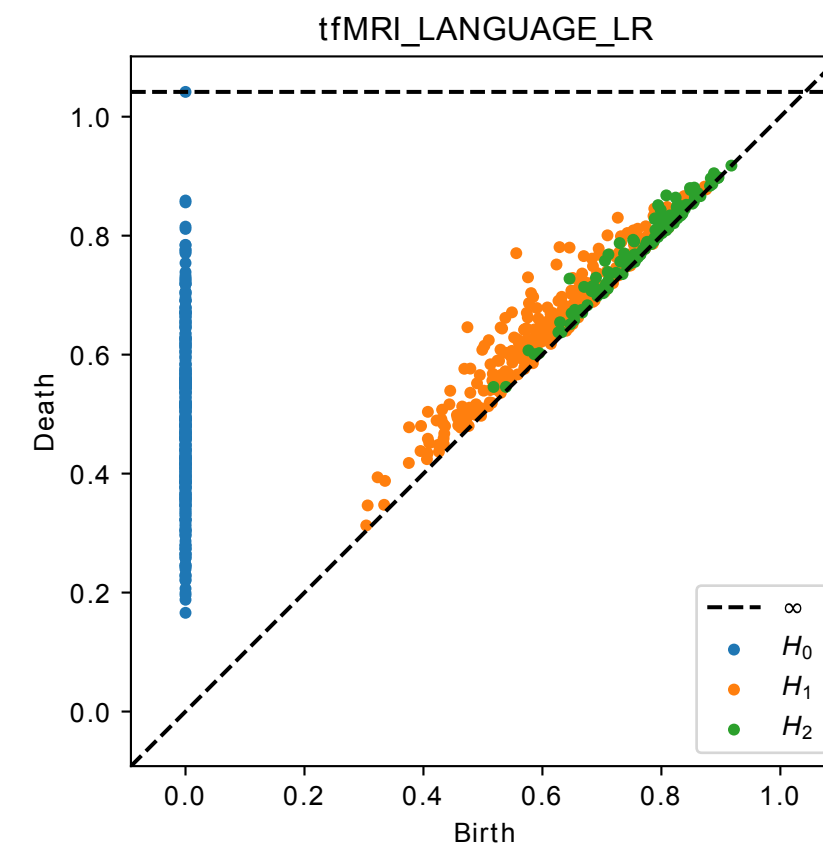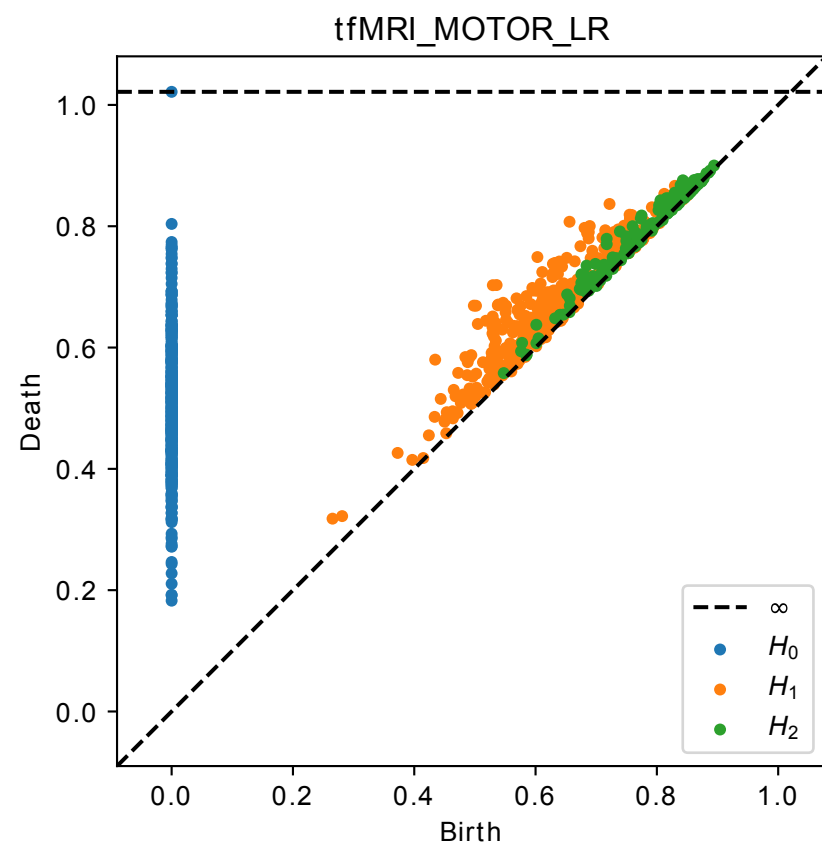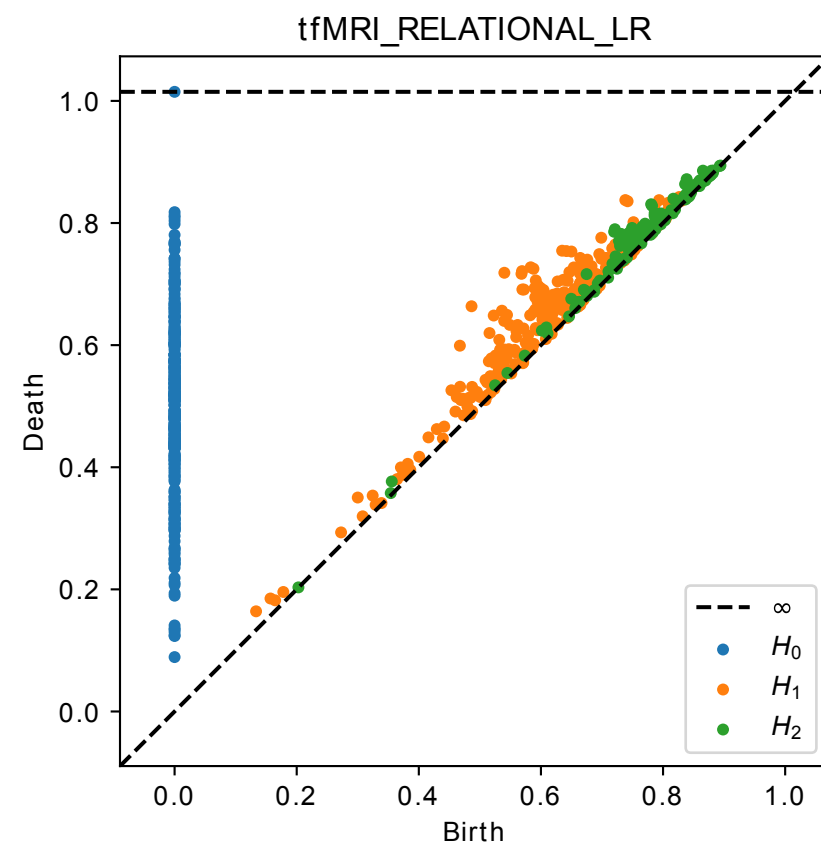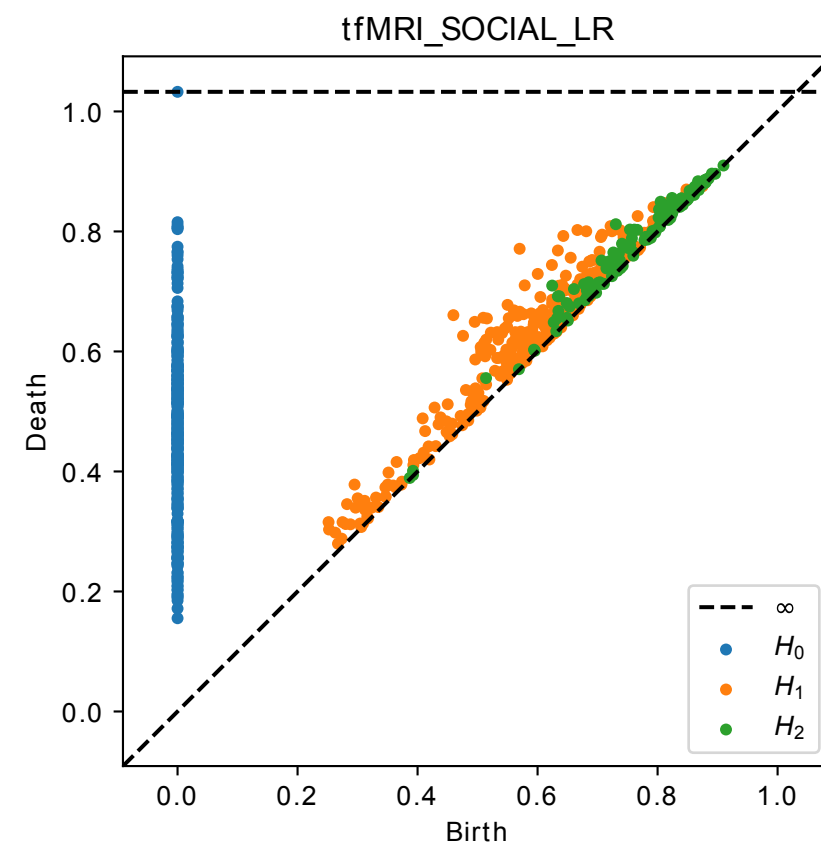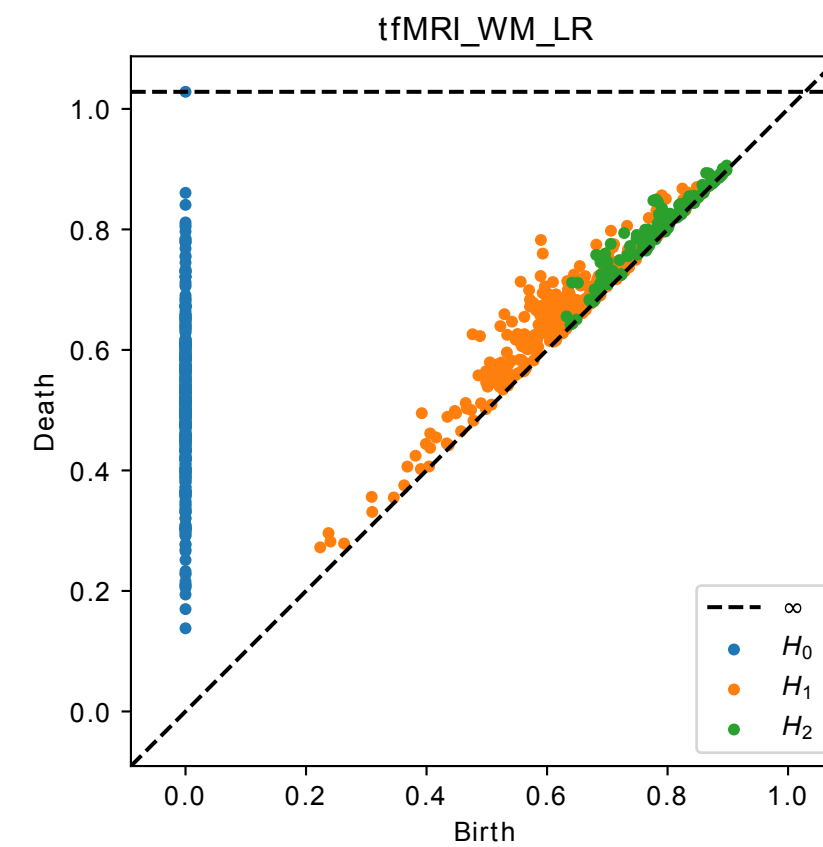

Supplement: s1 [file s1]
